# Supplementary material for: Patient and general practitioner views of tools to delay diagnostic imaging for low back pain: a qualitative study
Source: PubMed Central journal article supplement — BMJ Open. 2020 Nov 8;10(11):e039936. doi: 10.1136/bmjopen-2020-039936 (PMC7651716; doi:10.1136/bmjopen-2020-039936), 2020-11-08
Supplement: bmjopen-2020-039936.draft_revisions.pdf [file bmjopen-2020-039936.draft_revisions.pdf]

# BMJ Open

BMJ Open is committed to open peer review. As part of this commitment we make the peer review history of every article we publish publicly available.

When an article is published we post the peer reviewers' comments and the authors' responses online. We also post the versions of the paper that were used during peer review. These are the versions that the peer review comments apply to.

The versions of the paper that follow are the versions that were submitted during the peer review process. They are not the versions of record or the final published versions. They should not be cited or distributed as the published version of this manuscript.

BMJ Open is an open access journal and the full, final, typeset and author-corrected version of record of the manuscript is available on our site with no access controls, subscription charges or pay-per-view fees (<http://bmjopen.bmj.com>).

If you have any questions on BMJ Open's open peer review process please email [info.bmjopen@bmj.com](mailto:info.bmjopen@bmj.com)

# BMJ Open

## Patient and general practitioner views of tools to delay diagnostic imaging for musculoskeletal pain: a qualitative study

|                               |                                                                                                                                                                                                                                                                                                                                                                                                                                                                                                                                                                                                                                                                                                                                                                                                                                                                                                                                                                                                                                                                     |
|-------------------------------|---------------------------------------------------------------------------------------------------------------------------------------------------------------------------------------------------------------------------------------------------------------------------------------------------------------------------------------------------------------------------------------------------------------------------------------------------------------------------------------------------------------------------------------------------------------------------------------------------------------------------------------------------------------------------------------------------------------------------------------------------------------------------------------------------------------------------------------------------------------------------------------------------------------------------------------------------------------------------------------------------------------------------------------------------------------------|
| Journal:                      | <i>BMJ Open</i>                                                                                                                                                                                                                                                                                                                                                                                                                                                                                                                                                                                                                                                                                                                                                                                                                                                                                                                                                                                                                                                     |
| Manuscript ID                 | bmjopen-2020-039936                                                                                                                                                                                                                                                                                                                                                                                                                                                                                                                                                                                                                                                                                                                                                                                                                                                                                                                                                                                                                                                 |
| Article Type:                 | Original research                                                                                                                                                                                                                                                                                                                                                                                                                                                                                                                                                                                                                                                                                                                                                                                                                                                                                                                                                                                                                                                   |
| Date Submitted by the Author: | 29-Apr-2020                                                                                                                                                                                                                                                                                                                                                                                                                                                                                                                                                                                                                                                                                                                                                                                                                                                                                                                                                                                                                                                         |
| Complete List of Authors:     | <p>Traeger, Adrian; The University of Sydney Faculty of Medicine and Health, Institute for Musculoskeletal Health, Sydney School of Public Health</p> <p>Checketts, Juliet; Australian Commonwealth Department of Health, Behavioural Economics and Research Team</p> <p>Tcharkhedian, Elise; Liverpool Hospital</p> <p>O'Connor, Denise; Monash University, School of Public Health and Preventive Medicine</p> <p>Klinner, Christiane; The University of Sydney Faculty of Medicine and Health, Institute for Musculoskeletal Health, Sydney School of Public Health</p> <p>Sharma, Sweekriti; The University of Sydney Faculty of Medicine and Health, Sydney School of Public Health, Institute for Musculoskeletal Health</p> <p>Vyas, Parima; Australian Commonwealth Department of Health, Behavioural Economics and Research Team</p> <p>Albarqouni, Loai; Bond University Faculty of Health Sciences and Medicine,</p> <p>McCaffery, Kirsten; The University of Sydney, Sydney Health Literacy Lab, School of Public Health; The University of Sydney,</p> |
| Keywords:                     | Diagnostic radiology < RADIOLOGY & IMAGING, Quality in health care < HEALTH SERVICES ADMINISTRATION & MANAGEMENT, Rehabilitation medicine < INTERNAL MEDICINE, Back pain < ORTHOPAEDIC & TRAUMA SURGERY, INTERNAL MEDICINE                                                                                                                                                                                                                                                                                                                                                                                                                                                                                                                                                                                                                                                                                                                                                                                                                                          |
|                               |                                                                                                                                                                                                                                                                                                                                                                                                                                                                                                                                                                                                                                                                                                                                                                                                                                                                                                                                                                                                                                                                     |

SCHOLARONE™  
Manuscripts

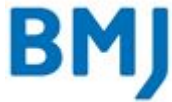

I, the Submitting Author has the right to grant and does grant on behalf of all authors of the Work (as defined in the below author licence), an exclusive licence and/or a non-exclusive licence for contributions from authors who are: i) UK Crown employees; ii) where BMJ has agreed a CC-BY licence shall apply, and/or iii) in accordance with the terms applicable for US Federal Government officers or employees acting as part of their official duties; on a worldwide, perpetual, irrevocable, royalty-free basis to BMJ Publishing Group Ltd ("BMJ") its licensees and where the relevant Journal is co-owned by BMJ to the co-owners of the Journal, to publish the Work in this journal and any other BMJ products and to exploit all rights, as set out in our [licence](#).

The Submitting Author accepts and understands that any supply made under these terms is made by BMJ to the Submitting Author unless you are acting as an employee on behalf of your employer or a postgraduate student of an affiliated institution which is paying any applicable article publishing charge ("APC") for Open Access articles. Where the Submitting Author wishes to make the Work available on an Open Access basis (and intends to pay the relevant APC), the terms of reuse of such Open Access shall be governed by a Creative Commons licence – details of these licences and which [Creative Commons](#) licence will apply to this Work are set out in our licence referred to above.

Other than as permitted in any relevant BMJ Author's Self Archiving Policies, I confirm this Work has not been accepted for publication elsewhere, is not being considered for publication elsewhere and does not duplicate material already published. I confirm all authors consent to publication of this Work and authorise the granting of this licence.

1  
2  
3 **Patient and general practitioner views of tools to delay diagnostic imaging for**  
4 **musculoskeletal pain: a qualitative study**  
5  
6

7 **Running head: Tools to delay diagnostic imaging**  
8  
9

10 Adrian C Traeger,<sup>1</sup> Juliet Checketts,<sup>2</sup> Elise Tcharkhedian,<sup>3</sup> Denise A O'Connor,<sup>4,5</sup> Christiane  
11 Klinner,<sup>1</sup> Sweekriti Sharma,<sup>1</sup> Parima Vyas,<sup>2</sup> Loai Albarqourni,<sup>6</sup> Kirsten McCaffery<sup>7</sup>  
12  
13

- 14  
15 1. The University of Sydney, Faculty of Medicine and Health, Institute for Musculoskeletal  
16 Health, Sydney School of Public Health. Level 10 North, King George V Building. Royal  
17 Prince Alfred Hospital. Missenden Road, Sydney, NSW, AUS 2050  
18  
19 2. Australian Commonwealth Department of Health, Behavioural Economics and Research  
20 Team. Canberra, ACT, AUS 2601  
21  
22 3. Liverpool Hospital, Liverpool, NSW, AUS 1871.  
23  
24 4. Cabrini Institute. Malvern, VIC, AUS 3144  
25  
26 5. Monash University, Department of Epidemiology and Preventive Medicine, School of  
27 Public Health and Preventive Medicine. Clayton, VIC, AUS 3144  
28  
29 6. Bond University, Faculty of Health Sciences and Medicine, Gold Coast, QLD, AUS 4229  
30  
31 7. The University of Sydney, Sydney Health Literacy Lab, Faculty of Medicine and Health,  
32 School of Public Health, Edward Ford Building (A27). Sydney, NSW, AUS 2006  
33  
34

35 **Corresponding author:**

36 Dr Adrian Traeger, PhD

37 adrian.traeger@sydney.edu.au

38 The University of Sydney

39 Faculty of Medicine and Health, School of Public Health, Institute for Musculoskeletal Health  
40 Level 10N, King George V Building, Royal Prince Alfred Hospital (C39)

41 PO Box M179, MISSENDEN ROAD NSW 2050

42 Tel +61 2 8627 6231  
43  
44  
45  
46

47 **Funding:** *Financial support for this study was provided entirely by a grant from the Australian National*  
48 *Health and Medical Research Council, NHMRC Program Grant (APP1113532) entitled Using healthcare*  
49 *wisely: reducing inappropriate use of tests and treatments. The funding agreement ensured the authors'*  
50 *independence in designing the study, interpreting the data, writing, and publishing the report.*  
51  
52

53 **Word count:** 2388  
54  
55

56 **Tables:** 2

57 **Boxes:** 2

58 **Figures:** 0

59 **Appendixes:** 3  
60

## Abstract

**OBJECTIVE:** Delayed prescribing is a promising strategy to manage patient requests for unnecessary tests and treatments. The purpose of this study was to explore general practitioner (GP) and patient views of three communication tools (an Overdiagnosis Leaflet, a Dialogue Sheet, and a 'Wait-and-see' Note) to support delayed prescribing of diagnostic imaging.

**DESIGN:** Qualitative study

**SETTING:** Primary and emergency care in Sydney, Australia

**PARTICIPANTS:** 16 GPs and 14 patients with recent episode of musculoskeletal pain

**OUTCOMES:** Views of tools to delay diagnostic imaging for musculoskeletal pain. Data were collected using a combination of focus groups and individual interviews.

**ANALYSIS:** Two researchers independently performed a thematic analysis, and the author team reviewed and refined the analysis.

**RESULTS:** GP participants responded positively to an Overdiagnosis Leaflet. The Dialogue Sheet and 'Wait-and-see' Note raised several concerns about patient pushback, adding to time pressure, and being overwhelmed with hard-to-find paper resources. GPs preferred to communicate verbally the reasons to delay an imaging test. For patients, the reactions to the tools were more positive. Patients valued written information and a signed agreement to delay the test. However, patients expressed that a strong desire for diagnostic imaging would be likely override any effect of written advice to delay the test. The term "false alarm" to describe overdiagnosis was poorly understood by patients.

1  
2  
3  
4 **CONCLUSIONS:** GPs and patients agreed that a leaflet about overdiagnosis could support a  
5  
6 delayed prescribing approach to musculoskeletal imaging. A Dialogue Sheet and 'Wait-and-  
7  
8 see' Note were acceptable to patients but not GPs.  
9  
10

11  
12  
13  
14 **Key words:** diagnostic radiology, quality in healthcare, rehabilitation medicine, back pain,  
15  
16 internal medicine  
17  
18  
19  
20  
21  
22  
23

#### 24 **Strengths and limitations of this study**

- 25  
26 ○ We sampled people involved in the decision to have diagnostic imaging for  
27  
28 musculoskeletal pain in emergency and primary care.
- 29  
30 ○ Our data collection methods allowed us to capture natural conversations in the focus  
31  
32 groups, and explore emergent themes in depth in the interviews.
- 33  
34 ○ GPs included in this study were attending a professional education event and may have  
35  
36 had more positive views of tools to delay imaging than the wider population of GPs.  
37  
38  
39  
40  
41  
42  
43  
44  
45  
46  
47  
48  
49  
50  
51  
52  
53  
54  
55  
56  
57  
58  
59  
60

## Introduction

Guidelines for musculoskeletal pain recommend that clinicians reserve diagnostic imaging tests for patients who have clinical features of serious pathology.(1) Yet on average general practitioners (GP) refer around one quarter of their patients with low back pain for imaging.(2) 82% of GPs surveyed would refer a patient with shoulder pain and suspected rotator cuff tendinopathy for an ultrasound at the first presentation.(3) In most cases these tests will not bring patients any benefit.(4) Instead, overuse of musculoskeletal imaging has negative consequences for the patient, the clinician, and health systems.(5)

A number of factors related to the patient-clinician interaction could drive overuse of imaging for musculoskeletal pain. A review of 17 qualitative studies identified 'perceived pressure from patients' as a key driver of guideline discordant imaging reported by doctors.(6) Indeed, around 50% of patients with low back pain believe imaging is necessary.(7) Also, many clinicians worry about medicolegal liability if they do not provide the test, and feel they lack tools to discuss the need for imaging with their patient.(8)

Tools that promote watchful waiting as an evidence-based alternative to imaging could be effective at reducing overuse. For example, information leaflets to support delayed prescribing, that is, where a GP provides a script but instructs the patient to wait and see if symptoms resolve, can reduce use of antibiotics.(9) One trial in the 1980s found this approach reduced imaging low back pain.(10) There is evidence that written delayed prescribing tools are acceptable to patients considering antibiotics and some screening tests.(11, 12) However, it is unclear how GPs and patients might react to tools for symptomatic conditions where imaging overuse is problematic.

1  
2  
3  
4  
5  
6 The aim of this study was to gather GP and patient views on three newly developed  
7  
8 communication tools (an Overdiagnosis Leaflet, a Dialogue Sheet, and a 'Wait-and-see'  
9  
10 Note) to support delayed prescribing of musculoskeletal imaging.  
11  
12  
13  
14  
15  
16  
17

## 18 Methods

### 19 20 **Study Design and Participants**

21  
22 We conducted a qualitative study with 4 focus groups and 8 individual interviews to explore  
23  
24 how GPs and patients understood and responded to the communication tools. We have  
25  
26 prepared this report to adhere to the COREQ checklist.<sup>(13)</sup> Additional methodological  
27  
28 details are provide in a COREQ table in Appendix 1.  
29  
30  
31  
32  
33  
34

35  
36 GPs who were practising in Australia were eligible to participate. For the GP participants we  
37  
38 recruited a sample of GPs who were attending a continuing professional development event  
39  
40 on 30 July 2019. For the patient participants we recruited men and women who had sought  
41  
42 care for low back pain between March and June 2019. We identified a consecutive list of  
43  
44 adult patients who presented with 'non-serious' low back pain to the Emergency  
45  
46 Department of Liverpool Hospital, Sydney.  
47  
48  
49  
50  
51

### 52 **Data Collection**

#### 53 54 *Focus groups*

55  
56  
57  
58  
59  
60



1  
2  
3 Each group comprised five to seven people. Sessions had the following format: baseline  
4  
5 questionnaire, introduction of study and facilitators, warm-up discussion, presentation of  
6  
7 the tools (Powerpoint slides plus paper versions), guided discussion of each tool (Box 1).  
8  
9

### 10 11 12 13 *Interviews*

14  
15 After the focus groups DO and JC conducted additional individual interviews with four GPs  
16  
17 and CK conducted additional interviews with four patients. We stopped recruiting patients  
18  
19 for interviews when no new themes emerged (data saturation).(14) Recruitment of GP  
20  
21 participants for interviews was limited by resources and not necessarily by data saturation.  
22  
23  
24  
25  
26

### 27 28 *Communication tools and discussion content*

29  
30 Table 1 describes the rationale and content of the three communication tools. Complete  
31  
32 versions of the tools are included in Appendix 2. The focus groups and interviews followed a  
33  
34 similar discussion format (Box 1). Each started with a short warm-up discussion of the role  
35  
36 of diagnostic imaging in low back pain. Participants were then presented with the three  
37  
38 tools, in turn, for discussion.  
39  
40  
41  
42  
43  
44

### 45 **Data Analysis**

46  
47 We performed a thematic analysis to identify main themes as well as divergent views.(15).  
48  
49 Three authors (AT, SS and CK) independently reviewed all transcripts. We developed a  
50  
51 library of codes in an iterative process, decided on a coding framework, and applied this  
52  
53 framework to the data. We used a 'constant comparison' approach, which involves  
54  
55 continually looking for similarities, differences, and other patterns within and across  
56  
57 transcripts.(16)  
58  
59  
60

## Patient and public involvement

We piloted the tools with consumers (n= 4) and clinicians (n=4) to optimise content prior to enrolling participants.

## Results

Sixteen GPs and 14 patients participated in the study. Table 2 shows the characteristics of participants. The majority of GP participants were female and had more than 20 years in practice. Patient participants were mostly born outside of Australia, middle-aged, and around half had a university education. All patient participants had had an imaging test in the past. Below we summarise the key findings with selected quotes. Additional supporting quotes (numbered in text as Q1, Q2, Q3 and so on) are provided in Appendix 3.

### 1. GP views

#### Overall GP reactions

GPs had mixed reactions to the tools (Box 2). Some GPs felt the communication tools could have a role in helping to manage difficult consultations:

“I guess if you had a really stroppy patient you didn’t know and didn’t think you’d get any follow up with, perhaps there could be a role.” (GP focus group)

However, most GPs reacted negatively to the Dialogue Sheet and Wait-and-see Note, and none of them reported they would use these in practice. They found the concept of written

1  
2  
3 prompts and co-signing an agreement with their patient, to be an insult to their clinical skill  
4  
5 and autonomy:  
6  
7  
8  
9

10 “No, no, I’d never use [*the dialogue sheet*] in a pink fit.” (GP focus group)  
11  
12  
13

14  
15 GPs felt paper-based tools in general were impractical, easily forgotten, and preferred  
16  
17 verbal reassurance (Q1).  
18  
19  
20  
21

22  
23 **GP reactions to the Overdiagnosis Leaflet: important content that would be useful in**  
24  
25 **digital format, but may induce patient anxiety**  
26  
27  
28  
29

30 GP participants responded most positively to the design and content of the Overdiagnosis  
31  
32 Leaflet. They valued the condition-specific information such as clinical features for lumbar  
33  
34 imaging and self-management advice (Q2). Some felt the language of the leaflet was too  
35  
36 emphatic and could discourage necessary imaging:  
37  
38  
39  
40  
41

42 “I mean [*the overdiagnosis leaflet*] would scare them off having a scan and maybe it  
43  
44 might scare some of the 1% who do need to have it.” (GP focus group)  
45  
46  
47  
48  
49

50 GP participants expressed a strong preference for easily accessible, web- or electronic  
51  
52 medical record-based fact sheets for use with their patients (Q3).  
53  
54  
55  
56  
57  
58  
59  
60

1  
2  
3 **GP reactions to the Dialogue Sheet: redundant for experienced GPs, would add to time**  
4  
5 **pressure**  
6  
7  
8  
9

10 Most GP participants felt the dialogue sheet would be superfluous, and preferred to  
11  
12 communicate the same messages verbally:  
13  
14  
15  
16

17  
18 “So, as I said, that’s the sort of thing I would be telling the patient as we went, and  
19  
20 maybe summarising at the end, but I would do that in a verbal fashion. I wouldn’t be  
21  
22 filling in a form like this.” (GP focus group)  
23  
24  
25

26  
27 Some were concerned the tools would just add to time pressure within the consultation  
28  
29 (Q4). Most GP participants did not want to sign the Dialogue Sheet and felt that patients  
30  
31 would be opposed to signing it as well:  
32  
33  
34  
35

36  
37 “It doesn’t need a contract, we’re not giving morphine out.” (GP focus group)  
38  
39  
40  
41  
42  
43  
44

45 **GP reactions to the Wait-and-see Note: could help validate concerns, but impractical**  
46  
47  
48  
49

50 One doctor noted that the language of the Wait-and-see Note could help validate a  
51  
52 patient’s experience:  
53  
54  
55  
56  
57  
58  
59  
60

1  
2  
3 “I guess what the writer was trying to get across was: ‘I acknowledge that you have  
4 real symptoms.’ I think that’s better, the patient wants me to know that they really  
5 have pain.” (GP focus group)  
6  
7  
8  
9

10  
11  
12  
13 A key barrier to use of the note was practicality. Participants felt verbal communication of  
14 similar messages would be more efficient (Q5).  
15  
16  
17

### 21 **Workforce issues and concerns about patient pushback (all tools):**

22  
23  
24  
25 Some GP participants felt the communication tools were more useful for less experienced  
26 doctors or other professions (Q6):  
27  
28  
29

30  
31  
32 “ This [*overdiagnosis leaflet*] is a document that absolutely needs to go into a lower  
33 than primary care level, at a community level.” (GP focus group)  
34  
35  
36  
37

38  
39  
40 GPs felt the Dialogue Sheet and Wait-and-see Note would be patronising to patients (Q7):  
41  
42  
43

44  
45 “[*If I were to use it with my patients*] They'd probably think I've gone mad.” (Female  
46 GP, infrequent requester of imaging)  
47  
48  
49  
50

## 54 **1. Patient views**

### 57 **Overall patient reactions**

1  
2  
3 Patients had generally positive reactions to all three tools (Box 2). In contrast to GP  
4  
5 responses, patients valued paper-based, written information and the perceived  
6  
7 accountability that a co-signed agreement section on the Dialogue Sheet and Wait-and-see  
8  
9 Note would provide:  
10  
11

12  
13  
14  
15 “I hate it when they don’t keep their word to see you again. So this one, when they  
16  
17 sign on it, they have to see you.” (Patient focus group)  
18  
19

20  
21  
22 For some, the perceived benefit of locating the source of low back pain, and ruling out  
23  
24 serious pathology, outweighed any advice to delay an imaging test (Q8). Others regarded the  
25  
26 tools with suspicion (Q9).  
27  
28  
29

30  
31  
32 **Patient reactions to the Overdiagnosis Leaflet: informative but alarming, prompts desire**  
33  
34 **to discuss harms of imaging with GP**  
35  
36

37  
38  
39 Most patient participants found the Overdiagnosis Leaflet clear, informative, and credible  
40  
41 (Q10). Some patients felt the Overdiagnosis Leaflet would encourage them to ask their  
42  
43 doctor questions about their care (Q11). Other patient participants were reluctant to  
44  
45 challenge the perceived authority of their doctor:  
46  
47  
48

49  
50  
51 “ I just don’t know if [my GP] would be comfortable hearing that from a patient.”  
52  
53  
54 (Male patient)  
55  
56  
57  
58  
59  
60

1  
2  
3 There was concern among patient participants that the Overdiagnosis Leaflet would  
4 discourage imaging for those who did need it (Q12). One patient participant reacted  
5 angrily to the concept that some scans might be unnecessary (Q13).  
6  
7  
8  
9

10  
11  
12  
13 **Patient reactions to the Dialogue Sheet: could improve recall of the consultation and**  
14  
15 **provide evidence of GP commitment**  
16

17  
18  
19  
20 In contrast to the Overdiagnosis Leaflet, which provoked some concerns, the Dialogue Sheet  
21 had potential to be reassuring (Q14). Patients had mixed reactions to the concept of co-  
22 signing an agreement to not have an imaging test; some felt it would be an odd process  
23 (Q15) where others appreciated the clinician's commitment (Q16).  
24  
25  
26  
27  
28  
29

30  
31  
32 **Patient reactions to the Wait-and-see Note: uses dismissive terminology and would be**  
33  
34 **easy to ignore**  
35  
36

37  
38  
39 Some patient participants found the concept of the Wait-and-see Note dismissive (Q17).  
40 One patient participant, who was an allied health professional, felt patients might ignore  
41 the note:  
42  
43  
44  
45  
46

47  
48  
49 "I think, personally, people, if they've got the referral there, I think they would just  
50 ignore that [*message to*] wait-and-see." (Female patient)  
51  
52  
53  
54  
55

56  
57 **Patient understanding and interpretation of content (all tools): take care with language to**  
58  
59 **describe overdiagnosis and related harms**  
60

1  
2  
3  
4  
5  
6 There was some suspicion among patient participants about the veracity of the data on the  
7  
8 magnitude of overdiagnosis in the Leaflet (Q18). One patient participant understood the link  
9  
10 between overdiagnosis and unnecessary surgery, but felt the odds of this happening were  
11  
12 not concerning:  
13  
14  
15  
16  
17

18 “...so only one will have surgery and they don’t need it. So 1 out 100? [*Facilitator:*  
19  
20 *Yeah, not that bad do you reckon?*]. Well yeah not that bad.” (Patient focus group)  
21  
22  
23  
24

25 The term “false alarm” was a poorly understood concept. Some patient participants felt the  
26  
27 term indicated that their problem was imaginary (Q19).  
28  
29  
30  
31  
32  
33  
34  
35  
36  
37  
38  
39  
40  
41  
42  
43  
44  
45  
46  
47  
48  
49  
50  
51  
52  
53  
54  
55  
56  
57  
58  
59  
60



## Discussion

### Summary

The GPs and patients we interviewed had divergent views on the value of three different communication tools to support delayed prescribing of musculoskeletal imaging. While almost all GPs rejected a tool with an example dialogue and discussion points, patients desired this process. Some patients appreciated the concept of co-signing an agreement to delay imaging, while others did not. The GPs we interviewed universally rejected this co-signing approach. There was variation in what patients and GPs considered to be a 'harm' from having imaging.

### Strengths and limitations

We conducted this study at a time when advanced imaging rates are increasing.<sup>(5)</sup> Understanding how both GPs and patients might use communication tools will help inform strategies to reduce this problem. We used a combination of focus groups and interviews, and sampled people involved in the decision to have diagnostic imaging in emergency and primary care. This allowed us to capture natural conversations in the groups, and explore emergent themes in depth in the interviews.

We were restricted to recruiting mainly from a GP professional development network, with a small number of additional participants recruited through an additional study. This group may have had more positive views than expected in the wider population of GPs. Though our data suggest they were highly sceptical of the materials and divergent from patients. Similarly, although all of the patients we included had seen a GP for their low back pain, they had also attended the Emergency Department of a public hospital for their low back

1  
2  
3 pain. This diverse group of patients may be different to those who typically attend a GP as  
4  
5 their first or only contact with the health system. The patient participants in this study might  
6  
7 also represent a group who take musculoskeletal pain very seriously and be more critical of  
8  
9 tools to delay or deter imaging.  
10  
11  
12  
13  
14

### 15 **Comparison with existing literature**

16  
17 Our findings are consistent with research showing that attempts to reduce or delay tests  
18  
19 can arouse suspicion about financial arrangements, government oversight, and motives to  
20  
21 cut costs.(17) This phenomenon also occurs in women considering breast cancer  
22  
23 screening.(18) Our study confirms that mistrust among patients could extend to  
24  
25 communicating about delayed musculoskeletal imaging, overdiagnosis, and the option of  
26  
27 watchful waiting.  
28  
29  
30  
31  
32  
33  
34

35 The patients we interviewed reacted with surprise to the nature and magnitude of imaging  
36  
37 overdiagnosis. Many of the patient participants struggled to think of harms of diagnostic  
38  
39 imaging, other than exposure to radiation. This finding supports evidence on patient  
40  
41 perceptions of overused screening tests e.g. the perception that the benefits of early  
42  
43 detection tend to outweigh the harms of unnecessary tests.(19) Our findings on how GPs  
44  
45 describe harms from overdiagnosis suggest that they may also hold this view.  
46  
47  
48  
49  
50  
51

### 52 **Implications for future research and practice**

53  
54 This study provides insights into the complexity of communicating about unnecessary  
55  
56 imaging to patients and GPs. Based on these findings there may be several ways to enhance  
57  
58 acceptability and uptake of delayed prescribing approaches. First, the language relating to  
59  
60

1  
2  
3 the necessity of diagnostic imaging tests should be cautious rather than emphatic. Patients  
4 may interpret harms differently; tools that describe risk of 'harms' would benefit from also  
5 providing clear examples of overdiagnosis. Second, tools should be in digital format for GPs  
6 but readily printed for patients who prefer paper-based information. Finally, a Dialogue  
7 Sheet with or without a co-sign agreement section requires further testing before  
8 implementing this kind of tool in clinical practice.  
9  
10  
11  
12  
13  
14  
15  
16  
17  
18  
19

## 20 **Conclusions**

21  
22 An information leaflet that explains the problem of overdiagnosis could support a delayed  
23 prescribing approach to musculoskeletal imaging. A Dialogue Sheet and Wait-and-see Note  
24 to help discuss a delayed imaging were acceptable to patients but not GPs.  
25  
26  
27  
28  
29  
30  
31

## 32 **Author Contributions**

33 *Study concept and design: All authors*

34 *Acquisition, analysis, or interpretation of data: All authors*

35 *Drafting of the manuscript: Traeger*

36 *Critical revision of the manuscript for important intellectual content: All authors*

37 *Analysis: All authors*

38 *Obtained funding: McCaffery, Traeger*

39 *Administrative, technical, or material support: none*

40 *Study supervision: Traeger*  
41  
42  
43  
44  
45  
46  
47  
48  
49  
50

51 **Funding:** This research was funded by an NHMRC Program Grant (APP1113532) entitled  
52 *Using healthcare wisely: reducing inappropriate use of tests and treatments.*  
53  
54  
55  
56  
57  
58  
59  
60

1  
2  
3 **Role of Funder/Sponsor:** The NHMRC (Program Grant APP1113532) had no role in the  
4 design or conduct of this study.  
5  
6  
7

8  
9 **Data sharing statement:** No additional data are available.  
10  
11

12  
13 **Ethics:** Study procedures were approved by the University of Sydney HREC (ref: 2019/591),  
14 the Southwest Sydney Local Health District HREC (ref: 2019/ETH00281), and the Bond  
15 University HREC (ref: LA03323).  
16  
17  
18  
19

20  
21  
22  
23 **Conflict of Interest Statement:** None declared.  
24  
25

26  
27  
28 **Acknowledgements:** We thank Prof Chris Maher, Prof Rachelle Buchbinder, and Prof Paul  
29 Glasziou for their valuable contributions to developing the tools and Luzian Ong for co-  
30 facilitating a focus group with GPs.  
31  
32  
33  
34  
35  
36  
37  
38  
39  
40  
41  
42  
43  
44  
45  
46  
47  
48  
49  
50  
51  
52  
53  
54  
55  
56  
57  
58  
59  
60

## References

1. Lin I, Wiles L, Waller R, et al. What does best practice care for musculoskeletal pain look like? Eleven consistent recommendations from high-quality clinical practice guidelines: systematic review. *Br J Sports Med*. 2020;54(2):79-86.
2. Downie A, Hancock M, Jenkins H, et al. How common is imaging for low back pain in primary and emergency care? Systematic review and meta-analysis of over 4 million imaging requests across 21 years. *Br J Sports Med*. 2019.
3. Buchbinder R, Staples MP, Shanahan EM, Roos JF. General practitioner management of shoulder pain in comparison with rheumatologist expectation of care and best evidence: an Australian national survey. *PLoS ONE*. 2013;8(4):e61243.
4. Chou R, Qaseem A, Owens DK, Shekelle P. Diagnostic imaging for low back pain: advice for high-value health care from the American College of Physicians. *Ann Intern Med*. 2011;154(3):181-9.
5. Smith-Bindman R, Kwan ML, Marlow EC, et al. Trends in Use of Medical Imaging in US Health Care Systems and in Ontario, Canada, 2000-2016. *JAMA*. 2019;322(9):843-56.
6. Slade SC, Kent P, Patel S, Bucknall T, Buchbinder R. Barriers to Primary Care Clinician Adherence to Clinical Guidelines for the Management of Low Back Pain: A Systematic Review and Metasynthesis of Qualitative Studies. *Clin J Pain*. 2016;32(9):800-16.
7. Jenkins HJ, Hancock MJ, Maher CG, French SD, Magnussen JS. Understanding patient beliefs regarding the use of imaging in the management of low back pain. *Eur J Pain*. 2015.
8. Sears ED, Caverly TJ, Kullgren JT, et al. Clinicians' Perceptions of Barriers to Avoiding Inappropriate Imaging for Low Back Pain-Knowing Is Not Enough. *JAMA Intern Med*. 2016;176(12):1866-8.
9. de Bont EG, Alink M, Falkenberg FC, Dinant GJ, Cals JW. Patient information leaflets to reduce antibiotic use and reconsultation rates in general practice: a systematic review. *BMJ open*. 2015;5(6):e007612.
10. Deyo RA, Diehl AK, Rosenthal M. Reducing roentgenography use. Can patient expectations be altered? *Arch Intern Med*. 1987;147(1):141-5.
11. Bunten A, Hawking M. Patient information can improve appropriate antibiotic prescribing. *Nursing in Practice*. 2015.
12. Jenkins M, Pirotta M, Walker JG, et al. 'Why don't I need a colonoscopy?' A novel approach to communicating risks and benefits of colorectal cancer screening. *Australian journal of general practice*. 2018;47(6):343-9.
13. Tong A, Sainsbury P, Craig J. Consolidated criteria for reporting qualitative research (COREQ): a 32-item checklist for interviews and focus groups. *International journal for quality in health care : journal of the International Society for Quality in Health Care*. 2007;19(6):349-57.
14. Bowen GA. Naturalistic inquiry and the saturation concept: a research note. *Qualitative research*. 2008;8(1):137-52.

- 1  
2  
3 15. Clarke V, Braun V, Hayfield N. Thematic analysis. *Qualitative psychology: A practical*  
4 *guide to research methods*. 2015:222-48.  
5
- 6 16. Pope C, Ziebland S, Mays N. Qualitative research in health care. *Analysing qualitative*  
7 *data*. *BMJ*. 2000;320(7227):114-6.  
8
- 9 17. Levinson W, Gorawara-Bhat R, Dueck R, et al. Resolving disagreements in the  
10 *patient-physician relationship: tools for improving communication in managed care*. *JAMA*.  
11 1999;282(15):1477-83.  
12
- 13 18. Hersch J, Jansen J, Barratt A, et al. Women's views on overdiagnosis in breast cancer  
14 *screening: a qualitative study*. *BMJ*. 2013;346:f158.  
15
- 16 19. Sutkowi-Hemstreet A, Vu M, Harris R, et al. Adult Patients' Perspectives on the  
17 *Benefits and Harms of Overused Screening Tests: a Qualitative Study*. *J Gen Intern Med*.  
18 2015;30(11):1618-26.  
19  
20  
21  
22  
23  
24  
25  
26  
27  
28  
29  
30  
31  
32  
33  
34  
35  
36  
37  
38  
39  
40  
41  
42  
43  
44  
45  
46  
47  
48  
49  
50  
51  
52  
53  
54  
55  
56  
57  
58  
59  
60

**Table 1.** Description and intended use of tools to support delayed prescribing of musculoskeletal imaging

|                                       | <b>Overdiagnosis Leaflet</b>                                                                                                                                                                                                                                                                                                                     | <b>Dialogue Sheet</b>                                                                                                                                                                                                                                                                                                                                                                                       | <b>Wait-and-see Note</b>                                                                                                                                                                                                                                                                                                                    |
|---------------------------------------|--------------------------------------------------------------------------------------------------------------------------------------------------------------------------------------------------------------------------------------------------------------------------------------------------------------------------------------------------|-------------------------------------------------------------------------------------------------------------------------------------------------------------------------------------------------------------------------------------------------------------------------------------------------------------------------------------------------------------------------------------------------------------|---------------------------------------------------------------------------------------------------------------------------------------------------------------------------------------------------------------------------------------------------------------------------------------------------------------------------------------------|
| <b>Why</b><br>Rationale               | Goal:<br>1. promote watchful waiting for people with low back pain<br>2. raise awareness of non-essential or 'low-value' lumbar imaging tests                                                                                                                                                                                                    | Goal:<br>1. promote watchful waiting for people with musculoskeletal pain<br>2. support doctor-patient communication and joint decision-making<br>3. Provide actions for patients to take to address their pain, as alternatives to imaging.                                                                                                                                                                | Goal:<br>1. promote watchful waiting for people with musculoskeletal pain<br>2. support doctor-patient communication and joint decision-making                                                                                                                                                                                              |
| <b>What</b><br>Materials and content  | 6-panel A4 folded leaflet<br><br>Designed by advertising company and researchers<br><br>Key messages<br>- Unnecessary lumbar scans can cause harm<br>- There are alternatives to imaging<br>- Speak to your doctor<br><br>Behavioural prompts<br>- Framing of harms from overdiagnosis<br>- Appeal to authority (quote from orthopaedic surgeon) | 1-page A5 sheet<br><br>Designed by the Commonwealth Department of Health and researchers<br><br>Key messages<br>- In your case I think imaging is unnecessary<br>- I recommend we delay decision to have a scan<br>- There are other actions you can take to address your pain<br><br>Behavioural prompts<br>- Present no imaging as the default<br>- Co-signature (patient and doctor) commitment to delay | 2-sided A6 note<br><br>Designed the Commonwealth Department of Health and researchers<br><br>Key message<br>- The referral is a backup; only to be used under specific circumstances (tailored to the patient)<br><br>Behavioural prompts<br>- Present no imaging as the default<br>- Co-signature (patient and doctor) commitment to delay |
| <b>Tailoring</b><br>to the individual | None                                                                                                                                                                                                                                                                                                                                             | Space to describe symptoms, things to look out for, name and date, customisable reasons to delay, recommended actions to manage pain and assist recovery                                                                                                                                                                                                                                                    | Review date, things to look out for                                                                                                                                                                                                                                                                                                         |

**Box 1: Focus group and interview topic guide***All participants*

- Participants take turns to read the tools and 'think aloud' as they read the content.
- Which elements of the tools did you like? Why?
- Which elements of the tools did you not like? Why?
- Do you have any suggestions for improvement?

*For GP participants*

- Are any of these tools something that you would use? What would improve usability?

*For patient participants*

- Did you gain any new information about imaging from these tools? If your doctor went through these tools with you, how would you feel? What would improve usability?



**Table 2. Participant characteristics (n=30)**

| Characteristics                                                    | Number of participants |            |
|--------------------------------------------------------------------|------------------------|------------|
|                                                                    | Patients (n=14)        | GPs (n=16) |
| <b>Age</b>                                                         |                        |            |
| 20-39                                                              | 5                      | 2          |
| 40-59                                                              | 7                      | 5          |
| 60-79                                                              | 2                      | 9          |
| <b>Sex</b>                                                         |                        |            |
| Female                                                             | 9                      | 12         |
| Male                                                               | 5                      | 4          |
| <b>Born outside of Australia</b>                                   |                        |            |
| Yes                                                                | 11                     | -          |
| No                                                                 | 3                      | -          |
| <b>University education</b>                                        |                        |            |
| Yes                                                                | 6                      | -          |
| No                                                                 | 8                      | -          |
| <b>Had an imaging test for back pain in the past</b>               | 14                     | -          |
| <b>Believe everyone with low back pain should have a scan</b>      | 11                     | 0          |
| <b>Years practicing as a GP</b>                                    |                        |            |
| 1-9                                                                | -                      | 2          |
| 10-19                                                              | -                      | 1          |
| 20+                                                                | -                      | 13         |
| <b>Self-reported imaging request rate</b>                          |                        |            |
| <10%                                                               | -                      | 6          |
| ~25%                                                               | -                      | 7          |
| ~50%                                                               | -                      | 2          |
| >75%                                                               | -                      | 1          |
| <b>Had an interest in management of musculoskeletal conditions</b> | -                      | 8          |

## Box 2. Summary of GP and patient views on communication tools to support delayed prescribing of musculoskeletal imaging

### GP views

#### Reaction to Overdiagnosis Leaflet

- *Useful, visually appealing information*
- *May increase anxiety and discourage necessary care*
- *Digitise tools, communicate using other media in waiting room*

#### Reaction to Dialogue Sheet

- *Preference for verbal communication*
- *Could add to time pressure*
- *Reluctance to sign*

#### Reaction to Wait-and-see Note

- *Validating messages*
- *Preference for verbal communication*

#### Workforce issues (all tools)

- *Experienced GPs don't need these tools*

#### Concerns about patient pushback (all tools)

- *Tools could undermine patient-clinician relationship*
- *Patient's (mis)interpretation of 'harms'*

### Patient views

#### Reaction to Overdiagnosis Leaflet

- *Authoritative, informative, reassuring, encourages discussion*
- *Desire for less emphatic language*
- *May increase anxiety, cause anger, and discourage necessary care*

#### Reaction to Dialogue Sheet

- *Appreciated as a take-home tool/memory aid*
- *Co-signed agreement could have mixed response*

#### Reaction to Wait-and-see Note

- *Uses dismissive terminology (e.g. "wait")*
- *Easily ignored*

#### Understanding and interpretation of content (all tools)

- *Understood concept of overdiagnosis but were sceptical of its magnitude*
- *Desire for clear definition of 'harm'*
- *Struggled with terminology for false positives*

## Appendix 1 - COREQ checklist

### The Consolidated Criteria for Reporting Qualitative Studies (COREQ): 32-item checklist

(Table developed from Tong et al., 2007)

| No. Item                                                                                                                                                                                | Guide questions/description                                                           | Notes                                                                                                                                                                                                                                         |
|-----------------------------------------------------------------------------------------------------------------------------------------------------------------------------------------|---------------------------------------------------------------------------------------|-----------------------------------------------------------------------------------------------------------------------------------------------------------------------------------------------------------------------------------------------|
| <b>Domain 1: Research team and reflexivity</b>                                                                                                                                          |                                                                                       |                                                                                                                                                                                                                                               |
| <b>The research team</b>                                                                                                                                                                |                                                                                       |                                                                                                                                                                                                                                               |
| AT, physiotherapist, PhD; SS, PhD student; JC, anthropologist, PhD; PV, behavioural scientist; ET, senior physiotherapist; CK, qualitative research assistant; LO behavioural scientist |                                                                                       |                                                                                                                                                                                                                                               |
| <b>Personal Characteristics</b>                                                                                                                                                         |                                                                                       |                                                                                                                                                                                                                                               |
| 1. Inter viewer/facilitator                                                                                                                                                             | Which author/s conducted the interview or focus group?                                | The focus groups were facilitated by AT, SS, JC, PV, AND CK. The interviews were facilitated by CK, JC and DO                                                                                                                                 |
| 2. Credentials                                                                                                                                                                          | What were the researcher's credentials? E.g. PhD, MD                                  | AT: PhD, SS: MPH, JC: PhD, CK: GCert (qualitative health research), DO: PhD                                                                                                                                                                   |
| 3. Occupation                                                                                                                                                                           | What was their occupation at the time of the study?                                   | AT, physiotherapist and research fellow; SS, PhD student; JC, behavioural insights unit, PhD; PV, behavioural insights unit; ET, senior physiotherapist; CK, qualitative research assistant; LO behavioural insights unit; DO research fellow |
| 4. Gender                                                                                                                                                                               | Was the researcher male or female?                                                    | The focus group facilitators were male (x1) and female (x3). The interviewers (CK, JC, DO) were female                                                                                                                                        |
| 5. Experience and training                                                                                                                                                              | What experience or training did the researcher(s) have?                               | AT, JC, and CK had experience with qualitative methods including facilitating focus groups and interviews                                                                                                                                     |
| <b>Relationship with participants</b>                                                                                                                                                   |                                                                                       |                                                                                                                                                                                                                                               |
| 6. Relationship established                                                                                                                                                             | Was a relationship established prior to study commencement?                           | The research team did not have any contact with participants prior to organising the time for the interview. Researchers had no professional or ongoing relationship with the participants.                                                   |
| 7. Participant knowledge of the interviewer                                                                                                                                             | What did the participants know about the researcher? e.g. personal goals, reasons for | Participants were informed that the researchers were interested in exploring the use of diagnostic                                                                                                                                            |

|                                          |                                                                                                                                                          |                                                                                                                                                                                                                                                                                                                                                                                                                                                                                                                                                                                                                                                                                                                                                                                                                      |
|------------------------------------------|----------------------------------------------------------------------------------------------------------------------------------------------------------|----------------------------------------------------------------------------------------------------------------------------------------------------------------------------------------------------------------------------------------------------------------------------------------------------------------------------------------------------------------------------------------------------------------------------------------------------------------------------------------------------------------------------------------------------------------------------------------------------------------------------------------------------------------------------------------------------------------------------------------------------------------------------------------------------------------------|
|                                          | doing the research                                                                                                                                       | imaging for musculoskeletal pain. The study was introduced to participants as an initiative to better understand the use of imaging for musculoskeletal pain.                                                                                                                                                                                                                                                                                                                                                                                                                                                                                                                                                                                                                                                        |
| 8. Interviewer characteristics           | What characteristics were reported about the interviewer/facilitator? e.g. Bias, assumptions, reasons and interests in the research topic                | Participants were informed that researchers were interested in improving communication between doctors and patients about imaging.                                                                                                                                                                                                                                                                                                                                                                                                                                                                                                                                                                                                                                                                                   |
| <b>Domain 2: Study design</b>            |                                                                                                                                                          |                                                                                                                                                                                                                                                                                                                                                                                                                                                                                                                                                                                                                                                                                                                                                                                                                      |
| <b><i>Theoretical framework</i></b>      |                                                                                                                                                          |                                                                                                                                                                                                                                                                                                                                                                                                                                                                                                                                                                                                                                                                                                                                                                                                                      |
| 9. Methodological orientation and Theory | What methodological orientation was stated to underpin the study? e.g. grounded theory, discourse analysis, ethnography, phenomenology, content analysis | We based our framework analysis on phenomenological orientation. Phenomenological methodology focuses on individual experience arising from the data, so was therefore appropriate to explore reactions to the tools.                                                                                                                                                                                                                                                                                                                                                                                                                                                                                                                                                                                                |
| <b><i>Participant selection</i></b>      |                                                                                                                                                          |                                                                                                                                                                                                                                                                                                                                                                                                                                                                                                                                                                                                                                                                                                                                                                                                                      |
| 10. Sampling                             | How were participants selected? e.g. purposive, convenience, consecutive, snowball                                                                       | We used a convenience sampling to select participants. For the GP participants we recruited a sample of GPs who were attending a continuing professional development event on 30 July 2019. We recruited an additional 7 GP participants from a separate study. That study's aim was to explore GP perceptions of audit and feedback letters focused on diagnostic imaging for musculoskeletal conditions. After the interview about the audit and feedback letter intervention, GPs were invited to take the three tools away with them to use in their practice, for a period of 3 weeks. Because they were participating in a separate study, the four GPs who participated in individual interviews were aware of a broader program of work to reduce unnecessary care by the Commonwealth Department of Health. |

|                                |                                                                             |                                                                                                                                                                                                                                                                                                                                                                                                                                                                                           |
|--------------------------------|-----------------------------------------------------------------------------|-------------------------------------------------------------------------------------------------------------------------------------------------------------------------------------------------------------------------------------------------------------------------------------------------------------------------------------------------------------------------------------------------------------------------------------------------------------------------------------------|
|                                |                                                                             | For the patient participants we recruited men and women attending a hospital emergency department for low back pain between March and June 2019.                                                                                                                                                                                                                                                                                                                                          |
| 11. Method of approach         | How were participants approached? e.g. face-to-face, telephone, mail, email | Patient participants were approached using text messages from the hospital clinician and research team, giving the participant an opportunity to opt in to the study. GP participants were approached at a continuing education event on low back pain.                                                                                                                                                                                                                                   |
| 12. Sample size                | How many participants were in the study?                                    | There were 30 participants in the study.                                                                                                                                                                                                                                                                                                                                                                                                                                                  |
| 13. Non-participation          | How many people refused to participate or dropped out? Reasons?             | Of the 40 patients who were invited and eligible, 10 agreed to participate in a focus group, and 4 in an individual phone interview.<br><br>Of the 23 GPs attending the event who were invited and eligible, 12 agreed to participate.                                                                                                                                                                                                                                                    |
| <b>Setting</b>                 |                                                                             |                                                                                                                                                                                                                                                                                                                                                                                                                                                                                           |
| 14. Setting of data collection | Where was the data collected? e.g. home, clinic, workplace                  | We held the sessions with GPs at the Institute for Musculoskeletal Health, a clinical research institute at the University of Sydney. We held the sessions with patients at a conference facility attached to Liverpool Hospital in Sydney.<br><br>Interviews were conducted over the phone.<br><br>GP participants were paid \$200 to reimburse for lost clinic time. Patient participants were paid \$50 to reimburse for their time and travel expenses, and were provided with lunch. |

|                                  |                                                                                   |                                                                                                                                                                                                                                                                                                  |
|----------------------------------|-----------------------------------------------------------------------------------|--------------------------------------------------------------------------------------------------------------------------------------------------------------------------------------------------------------------------------------------------------------------------------------------------|
| 15. Presence of non-participants | Was anyone else present besides the participants and researchers?                 | ET attended one of the patient focus groups. No other non-participants were present in the focus groups or interviews                                                                                                                                                                            |
| 16. Description of sample        | What are the important characteristics of the sample? e.g. demographic data, date | We conducted four focus groups, two with GPs held on 30 July 2019, and two with patients held on 23 August 2019. See Table 2 for participant characteristics                                                                                                                                     |
| <b>Data collection</b>           |                                                                                   |                                                                                                                                                                                                                                                                                                  |
| 17. Interview guide              | Were questions, prompts, guides provided by the authors? Was it pilot tested?     | Interviews and focus groups were semi-structured and followed the topic guide in Box 1. The interview guide was not pilot tested.                                                                                                                                                                |
| 18. Repeat interviews            | Were repeat inter views carried out? If yes, how many?                            | No repeat interviews were carried out                                                                                                                                                                                                                                                            |
| 19. Audio/visual recording       | Did the research use audio or visual recording to collect the data?               | We audio recorded all focus group discussions and interviews. The recordings were transcribed verbatim.                                                                                                                                                                                          |
| 20. Field notes                  | Were field notes made during and/or after the interview or focus group?           | Facilitators made field notes throughout the interviews identified salient themes. After the focus groups, moderators involved in the sessions (AT, CK, PV, JC, SS, ET) independently documented their observations and emerging key themes. They then discussed these initial themes as a team. |
| 21. Duration                     | What was the duration of the interviews or focus group?                           | The focus group sessions lasted 60 to 90 minutes and had at least two facilitators from the author team. The interview sessions lasted 20 to 40min.                                                                                                                                              |
| 22. Data saturation              | Was data saturation discussed?                                                    | Preliminary analysis suggested thematic consistency among patient participants; recruitment took place until saturation reached in individual interviews (determined by CK).                                                                                                                     |

|                                        |                                                                                                                                  |                                                                                                                                                                                                                                                                                                                                                |
|----------------------------------------|----------------------------------------------------------------------------------------------------------------------------------|------------------------------------------------------------------------------------------------------------------------------------------------------------------------------------------------------------------------------------------------------------------------------------------------------------------------------------------------|
| 23. Transcripts returned               | Were transcripts returned to participants for comment and/or correction?                                                         | Transcripts were not returned to participants for comment and/or correction                                                                                                                                                                                                                                                                    |
| <b>Domain 3: Analysis and findings</b> |                                                                                                                                  |                                                                                                                                                                                                                                                                                                                                                |
| <b>Data analysis</b>                   |                                                                                                                                  |                                                                                                                                                                                                                                                                                                                                                |
| 24. Number of data coders              | How many data coders coded the data?                                                                                             | Two authors coded the entire dataset (AT, CK) and a third (SS) reviewed the transcripts and coding                                                                                                                                                                                                                                             |
| 25. Description of the coding tree     | Did authors provide a description of the coding tree?                                                                            | A refined version of the coding tree is provided in Box 2                                                                                                                                                                                                                                                                                      |
| 26. Derivation of themes               | Were themes identified in advance or derived from the data?                                                                      | Themes were derived from the data. The research team met to discuss emerging themes throughout the analysis, and interpretation of the data. Key themes that the team agreed on were used to develop an initial coding framework for the data. These discussions also led to refinement of the discussion guide for the individual interviews. |
| 27. Software                           | What software, if applicable, was used to manage the data?                                                                       | Microsoft Word was used for Framework analysis                                                                                                                                                                                                                                                                                                 |
| 28. Participant checking               | Did participants provide feedback on the findings?                                                                               | Participants did not provide feedback on the overall findings                                                                                                                                                                                                                                                                                  |
| <b>Reporting</b>                       |                                                                                                                                  |                                                                                                                                                                                                                                                                                                                                                |
| 29. Quotations presented               | Were participant quotations presented to illustrate the themes/ findings? Was each quotation identified? E.g. participant number | Participant quotes presented in main text to illustrate themes. Quotes from individual interviews are identified with age and sex (patients) and years of experience (GPs)                                                                                                                                                                     |
| 30. Data and findings consistent       | Was there consistency between the data presented and the findings?                                                               | We included key quotes that reflect our main findings                                                                                                                                                                                                                                                                                          |
| 31. Clarity of major themes            | Were major themes clearly presented in the findings?                                                                             | Major themes are presented clearly under subheadings                                                                                                                                                                                                                                                                                           |
| 32. Clarity of minor themes            | Is there a description of diverse cases or discussion of minor themes?                                                           | Diverse cases and minor subthemes are discussed after each major theme is described.                                                                                                                                                                                                                                                           |

Appendix 2 - Tools  
Figure S1. Overdiagnosis Leaflet

**“Most people won't benefit from having a scan. It won't find the cause of the pain, and leads to harmful, ineffective treatment”**

---

Professor Ian Harris,  
Orthopaedic Surgeon

**Still unsure?**

When you talk to a doctor, ask:

1. Do I really need a scan?
2. What are the risks?
3. What happens if I don't have a scan?



Institute for Musculoskeletal Health  
School of Public Health, Faculty of Medicine and Health  
The University of Sydney  
Level 10 KGV Building, Missenden Road  
Camperdown NSW 2050  
msk.health@sydney.edu.au  
scanyouroptions.org



**Scan your options**

**— not your back**

**BACK SCANS CAN'T HEAL — THEY CAN HARM**

**What are my options?**

**Not everyone needs a scan**

Back scans include x-rays, CT and MRIs. 99% of people who see a doctor for low back pain do not need a scan. This is important to know, because unnecessary scans cause harm. This leaflet contains information about back scans and other options to help your back pain.

**Unusual back pain**

You may need a scan if you have

- a temperature or fever
- unusual changes going to the toilet
- unusual numbness around your bottom
- cancer
- recent infection or use of injecting drugs
- inability to move legs or feet

**Usual back pain**

The following symptoms do not require a back scan

- spasms
- severe back pain
- difficulty moving

**Why you should scan your options, not your back**

For every 100 people with usual low back pain who get a scan\*

|           |                                    |
|-----------|------------------------------------|
| <b>68</b> | Will get false alarms*             |
| <b>11</b> | Will recover more slowly           |
| <b>1</b>  | Will have surgery they didn't need |
| <b>0</b>  | Will be better off                 |

\* A false alarm is a test result that seems serious (e.g. 'disc bulge') but is common in healthy people without back pain. Many people get a false alarm on their scan results. This can lead to unnecessary surgery and other treatments that don't help. If you have the usual signs of low back pain, doctors recommend avoiding back scans.

**Get back to better**

**Back pain improves on its own**

You can do things to help your back pain at home—even if your pain is very bad. Expert doctors recommend trying some of the options below to manage your pain in the short term. Doing these things could avoid a long wait at the doctor. If you don't have unusual signs (page 1), you don't have to make a decision about having a back scan right now.

-  Gentle movement
-  Use heat eg. hot water bottle or wheat pack
-  Don't rest for too long
-  Use pharmacy medication (if needed)
-  Give yourself time



Figure S2. Dialogue Sheet

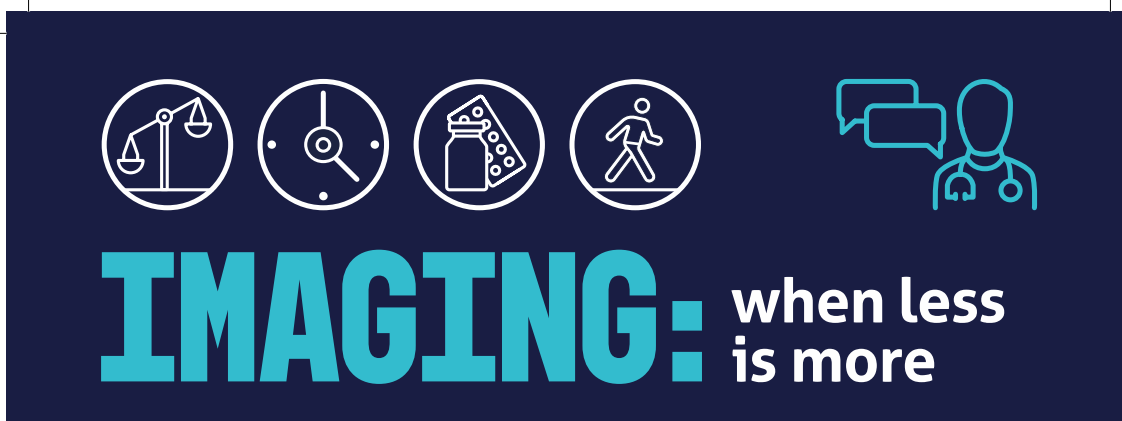

Dear: \_\_\_\_\_

**Based on my review today** \_\_\_\_\_ (date)

I'm not referring you straight for imaging for your

\_\_\_\_\_ pain, because:

- I have checked you and imaging won't change the treatment that you need today
- Your symptoms should improve over the next \_\_\_\_\_ days/weeks
- Findings from imaging can often be unimportant or not significant and cause anxiety and lead to tests that won't help you

**What you can do:**

- Use over the counter medicines for pain relief \_\_\_\_\_ (list medicines)
- Heat/ice for pain relief (circle one)
- Gradually return to your normal activities
- Other \_\_\_\_\_

**If your pain persists I'd like to review you in \_\_\_\_\_ weeks**

but come back sooner if you are concerned or if the pain changes

I am happy with this plan:  Yes  No (patient to tick)

**Signed:** \_\_\_\_\_ (doctor)

**Signed:** \_\_\_\_\_ (patient)

Figure S3. Wait-and-see Note

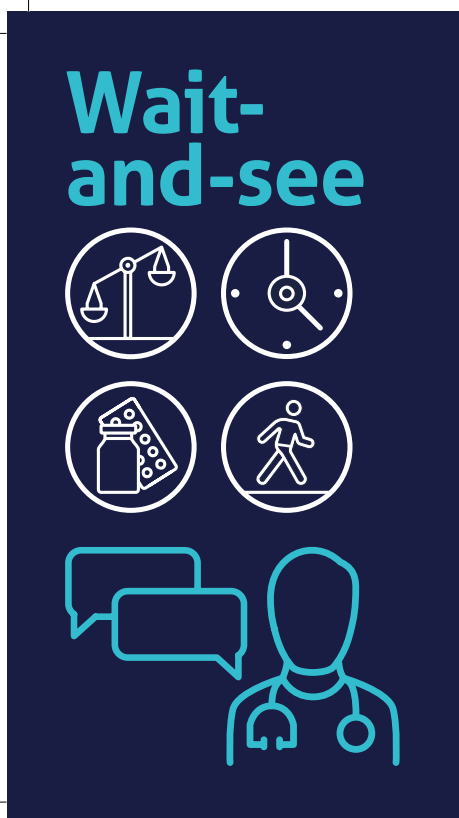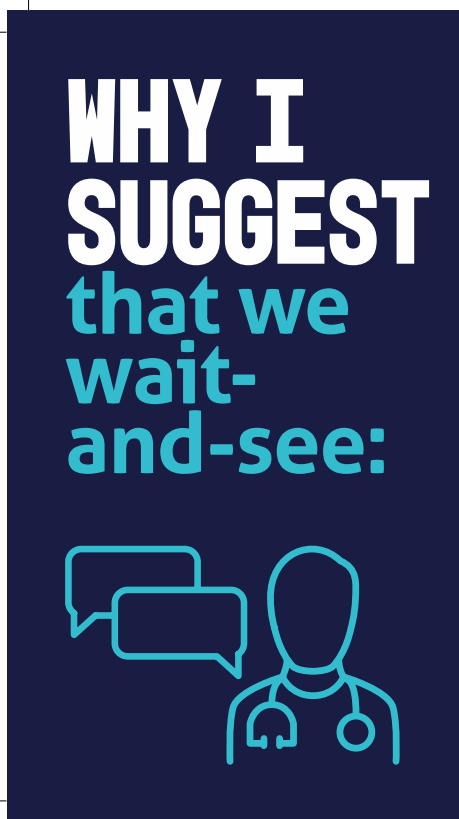

**We have agreed to wait \_\_\_\_\_ weeks before having the test.**

If you have not improved by then, I suggest you have the test and make an appointment with me to discuss the results.

**Signed:** \_\_\_\_\_  
(doctor)

**I am happy with this plan**

Yes  No

**Signed:** \_\_\_\_\_  
(patient)

Why have I asked you to wait? See over for details.

- Musculoskeletal pain can improve rapidly. For example, around 50% of people who experience an episode of back pain recover within 2 weeks.
- There are harms associated with unnecessary imaging.
- I have assessed you and although I don't believe imaging is needed, I can see that you are still concerned.

**Contact me earlier if you experience any of the following:**

\_\_\_\_\_

\_\_\_\_\_

\_\_\_\_\_

### Appendix 3 - Supporting quotes

Q1 "Would I use [*the dialogue sheet and note*]? Probably not. I, probably again, I would document [*instruction to delay*] in the notes. I do document this sort of thing in the notes" (Female GP, infrequent requester of imaging )

Q2 "It's got great statements, it's got statistics, it's a beautiful document. Not sure about the colours, but the document is great." (GP focus group)

Q3 "Young people don't like paper any more. So if you can send it to them so they can have it on their phone [*that would be better than paper*]." (GP focus group)

Q4 "So, if the patient is going to have to sit down and read this, and try to understand it, and then sign it, it's just going to lengthen things out. It's just not going to be feasible." (GP focus group)

Q5 "You just tell them verbally most people will get better but, if you're not, then you can go and have this." (GP focus group)

Q6 "I think this could be good for a junior doctor, registrar who are not empowered as opposed to more experienced GPs with their loyal patient base." (GP focus group)

Q7 "These pieces of paper are the opposite [*to patient centered care*], these are all giving me, the doctor, the power. And the patient is the person who's below me doing what I have told them." (GP focus group)

Q8 "I want to know what's happening inside me and the best way to know is to have an MRI scan. That's what we've been taught for many years that's what the doctors have said to us. Maybe the new generation can have a different view on it, but from my perspective, I think if I'm feeling neck pain or shoulders I would have my ultrasound. I want to know what's happening inside." (Male patient)

1  
2  
3 Q9 "I'm just now thinking maybe the doctors, the government, whatever, want all the  
4 people with the back pain not to do the scans any more, why?" (Patient focus group)  
5  
6  
7

8 Q10 "I'm assuming the quote comes from Professor at the bottom of the page. So yeah I  
9 think it's a fairly accurate statement, easy to understand, good advice. I guess it's clarified  
10 that he's an orthopaedic surgeon so that adds some weight to the comment." (Male  
11 patient)  
12  
13  
14  
15

16  
17  
18 Q11 "I like it. 'What if I don't have a scan?' I find that a really interesting question because  
19 yeah, I suppose it just allows more communication by asking that question.... it opens up  
20 that communication path again." (Female patient)  
21  
22  
23

24  
25 Q12 "it potentially causes alarm for people who are going to require a scan." (Male patient)  
26  
27  
28

29 Q13 "Telling me that a scan is not going to find something is a waste of my time. Not a  
30 waste of my time, but I'm angry as soon as I see it. I'm pissed off at that." (Patient focus  
31 group)  
32  
33  
34

35  
36 Q14 "If as a patient I had this on a referral I think it would give me a little bit more guidance.  
37 It would still make me feel like something is happening and validating my actual concerns or  
38 pain." (Female patient)  
39  
40  
41

42  
43 Q15 "I don't think signing it really adds any value to it, it just seems a bit strange. It's like  
44 you're entering into a contract. It just seems a bit unusual to have to sign the document."  
45 (Male patient)  
46  
47  
48

49  
50 Q16 "... if he says he reviews us in two weeks, and he's signed it as well, if you come and he  
51 cancels it, it's on him. So it's peace of mind." (Patient focus group participant)  
52  
53  
54

55  
56 Q17 "Wait for what? I'm in pain, I'm suffering. Why wait four weeks *[to find out]* what's  
57 going to happen? If he's going to tell me 'ok take the tablets maybe the pain is going to go  
58 or not' I would feel like *[he doesn't]* care." (Patient focus group participant)  
59  
60

1  
2  
3  
4  
5 Q18 “Is it real data we’re looking at?” (Patient focus group)  
6  
7

8  
9 Q19 “...reading the narrative of that just tells me that perhaps I’m playing it up a bit in my  
10 head.” (Male patient)  
11  
12  
13  
14  
15  
16  
17  
18  
19  
20  
21  
22  
23  
24  
25  
26  
27  
28  
29  
30  
31  
32  
33  
34  
35  
36  
37  
38  
39  
40  
41  
42  
43  
44  
45  
46  
47  
48  
49  
50  
51  
52  
53  
54  
55  
56  
57  
58  
59  
60

For peer review only

# BMJ Open

## Patient and general practitioner views of tools to delay diagnostic imaging for low back pain: a qualitative study

|                                 |                                                                                                                                                                                                                                                                                                                                                                                                                                                                                                                                                                                                                                                                                                                                                                                                                                                                                                                                                                                                                                                                     |
|---------------------------------|---------------------------------------------------------------------------------------------------------------------------------------------------------------------------------------------------------------------------------------------------------------------------------------------------------------------------------------------------------------------------------------------------------------------------------------------------------------------------------------------------------------------------------------------------------------------------------------------------------------------------------------------------------------------------------------------------------------------------------------------------------------------------------------------------------------------------------------------------------------------------------------------------------------------------------------------------------------------------------------------------------------------------------------------------------------------|
| Journal:                        | <i>BMJ Open</i>                                                                                                                                                                                                                                                                                                                                                                                                                                                                                                                                                                                                                                                                                                                                                                                                                                                                                                                                                                                                                                                     |
| Manuscript ID                   | bmjopen-2020-039936.R1                                                                                                                                                                                                                                                                                                                                                                                                                                                                                                                                                                                                                                                                                                                                                                                                                                                                                                                                                                                                                                              |
| Article Type:                   | Original research                                                                                                                                                                                                                                                                                                                                                                                                                                                                                                                                                                                                                                                                                                                                                                                                                                                                                                                                                                                                                                                   |
| Date Submitted by the Author:   | 04-Aug-2020                                                                                                                                                                                                                                                                                                                                                                                                                                                                                                                                                                                                                                                                                                                                                                                                                                                                                                                                                                                                                                                         |
| Complete List of Authors:       | <p>Traeger, Adrian; The University of Sydney Faculty of Medicine and Health, Institute for Musculoskeletal Health, Sydney School of Public Health</p> <p>Checketts, Juliet; Australian Commonwealth Department of Health, Behavioural Economics and Research Team</p> <p>Tcharkhedian, Elise; Liverpool Hospital</p> <p>O'Connor, Denise; Monash University, School of Public Health and Preventive Medicine</p> <p>Klinner, Christiane; The University of Sydney Faculty of Medicine and Health, Institute for Musculoskeletal Health, Sydney School of Public Health</p> <p>Sharma, Sweekriti; The University of Sydney Faculty of Medicine and Health, Sydney School of Public Health, Institute for Musculoskeletal Health</p> <p>Vyas, Parima; Australian Commonwealth Department of Health, Behavioural Economics and Research Team</p> <p>Albarqouni, Loai; Bond University Faculty of Health Sciences and Medicine,</p> <p>McCaffery, Kirsten; The University of Sydney, Sydney Health Literacy Lab, School of Public Health; The University of Sydney,</p> |
| <b>Primary Subject Heading</b>: | Qualitative research                                                                                                                                                                                                                                                                                                                                                                                                                                                                                                                                                                                                                                                                                                                                                                                                                                                                                                                                                                                                                                                |
| Secondary Subject Heading:      | Patient-centred medicine, Radiology and imaging, Communication                                                                                                                                                                                                                                                                                                                                                                                                                                                                                                                                                                                                                                                                                                                                                                                                                                                                                                                                                                                                      |
| Keywords:                       | Diagnostic radiology < RADIOLOGY & IMAGING, Quality in health care < HEALTH SERVICES ADMINISTRATION & MANAGEMENT, Rehabilitation medicine < INTERNAL MEDICINE, Back pain < ORTHOPAEDIC & TRAUMA SURGERY, INTERNAL MEDICINE                                                                                                                                                                                                                                                                                                                                                                                                                                                                                                                                                                                                                                                                                                                                                                                                                                          |
|                                 |                                                                                                                                                                                                                                                                                                                                                                                                                                                                                                                                                                                                                                                                                                                                                                                                                                                                                                                                                                                                                                                                     |

SCHOLARONE™  
Manuscripts



I, the Submitting Author has the right to grant and does grant on behalf of all authors of the Work (as defined in the below author licence), an exclusive licence and/or a non-exclusive licence for contributions from authors who are: i) UK Crown employees; ii) where BMJ has agreed a CC-BY licence shall apply, and/or iii) in accordance with the terms applicable for US Federal Government officers or employees acting as part of their official duties; on a worldwide, perpetual, irrevocable, royalty-free basis to BMJ Publishing Group Ltd ("BMJ") its licensees and where the relevant Journal is co-owned by BMJ to the co-owners of the Journal, to publish the Work in this journal and any other BMJ products and to exploit all rights, as set out in our [licence](#).

The Submitting Author accepts and understands that any supply made under these terms is made by BMJ to the Submitting Author unless you are acting as an employee on behalf of your employer or a postgraduate student of an affiliated institution which is paying any applicable article publishing charge ("APC") for Open Access articles. Where the Submitting Author wishes to make the Work available on an Open Access basis (and intends to pay the relevant APC), the terms of reuse of such Open Access shall be governed by a Creative Commons licence – details of these licences and which [Creative Commons](#) licence will apply to this Work are set out in our licence referred to above.

Other than as permitted in any relevant BMJ Author's Self Archiving Policies, I confirm this Work has not been accepted for publication elsewhere, is not being considered for publication elsewhere and does not duplicate material already published. I confirm all authors consent to publication of this Work and authorise the granting of this licence.

# Patient and general practitioner views of tools to delay diagnostic imaging for low back pain: a qualitative study

## Running head: Tools to delay diagnostic imaging

Adrian C Traeger PhD,<sup>1</sup> Juliet Checketts PhD,<sup>2</sup> Elise Tcharkhedian BPhy,<sup>3</sup> Denise A O'Connor PhD,<sup>4,5</sup> Christiane Kliner,<sup>1</sup> Sweekriti Sharma MPH,<sup>1</sup> Parima Vyas,<sup>2</sup> Loai Albarqouni PhD,<sup>6</sup> Kirsten McCaffery PhD<sup>7</sup>

1. The University of Sydney, Faculty of Medicine and Health, Institute for Musculoskeletal Health, Sydney School of Public Health. Level 10 North, King George V Building. Royal Prince Alfred Hospital. Missenden Road, Sydney, NSW, AUS 2050
2. Australian Commonwealth Department of Health, Behavioural Economics and Research Team. Canberra, ACT, AUS 2601
3. Liverpool Hospital, Liverpool, NSW, AUS 1871.
4. Cabrini Institute. Malvern, VIC, AUS 3144
5. Monash University, Department of Epidemiology and Preventive Medicine, School of Public Health and Preventive Medicine. Clayton, VIC, AUS 3144
6. Bond University, Faculty of Health Sciences and Medicine, Gold Coast, QLD, AUS 4229
7. The University of Sydney, Sydney Health Literacy Lab, Faculty of Medicine and Health, School of Public Health, Edward Ford Building (A27). Sydney, NSW, AUS 2006

### Corresponding author:

Dr Adrian Traeger, PhD

adrian.traeger@sydney.edu.au

The University of Sydney

Faculty of Medicine and Health, School of Public Health, Institute for Musculoskeletal Health Level 10N, King George V Building, Royal Prince Alfred Hospital (C39)

PO Box M179, MISSENDEN ROAD NSW 2050

Tel +61 2 8627 6231

**Funding:** *Financial support for this study was provided entirely by a grant from the Australian National Health and Medical Research Council, NHMRC Program Grant (APP1113532) entitled Using healthcare wisely: reducing inappropriate use of tests and treatments. The funding agreement ensured the authors' independence in designing the study, interpreting the data, writing, and publishing the report.*

**Word count:** 3871

**Tables:** 2

**Boxes:** 2

**Figures:** 0



**Appendixes: 3****Abstract**

**OBJECTIVE:** Delayed prescribing is a promising strategy to manage patient requests for unnecessary tests and treatments. The purpose of this study was to explore general practitioner (GP) and patient views of three communication tools (an Overdiagnosis Leaflet, a Dialogue Sheet, and a 'Wait-and-see' Note) to support delayed prescribing of diagnostic imaging.

**DESIGN:** Qualitative study

**SETTING:** Primary and emergency care in Sydney, Australia

**PARTICIPANTS:** 16 GPs and 14 patients with recent episode of low back pain

**OUTCOMES:** Views of tools to delay diagnostic imaging for low back pain. Data were collected using a combination of focus groups and individual interviews.

**ANALYSIS:** Two researchers independently performed a thematic analysis, and the author team reviewed and refined the analysis.

**RESULTS:** GP participants responded positively to an Overdiagnosis Leaflet. The Dialogue Sheet and 'Wait-and-see' Note raised several concerns about patient pushback, adding to time pressure, and being overwhelmed with hard-to-find paper resources. GPs preferred to communicate verbally the reasons to delay an imaging test. For patients, the reactions to the tools were more positive. Patients valued written information and a signed agreement to delay the test. However, patients expressed that a strong desire for diagnostic imaging would be likely override any effect of written advice to delay the test. The term "false alarm" to describe overdiagnosis was poorly understood by patients.

1  
2  
3  
4 **CONCLUSIONS:** GPs and patients agreed that a leaflet about overdiagnosis could support a  
5  
6 delayed prescribing approach to imaging for low back pain. A Dialogue Sheet and 'Wait-and-  
7  
8 see' Note were acceptable to patients but not GPs.  
9  
10

11  
12  
13  
14 **Key words:** diagnostic radiology, quality in healthcare, rehabilitation medicine, back pain,  
15  
16 internal medicine  
17  
18  
19  
20  
21  
22  
23

24 **Strengths and limitations of this study**

- 25  
26  
27  
28  
29  
30  
31  
32  
33  
34  
35  
36  
37  
38  
39  
40  
41  
42  
43  
44  
45  
46  
47  
48  
49  
50  
51  
52  
53  
54  
55  
56  
57  
58  
59  
60
- We sampled people involved in the decision to have diagnostic imaging for low back pain in emergency and primary care.
  - Our data collection methods allowed us to capture natural conversations in the focus groups, and explore emergent themes in depth in the interviews.
  - GPs included in this study were attending a professional education event and may have had more positive views of tools to delay imaging than the wider population of GPs.

## Introduction

Guidelines for low back pain recommend that clinicians reserve diagnostic imaging tests for patients who have clinical features of serious pathology.(1) Yet on average general practitioners (GP) refer around one quarter of their patients with low back pain for imaging.(2) In most cases these tests will not bring patients any benefit.(3) Instead, overuse of imaging has negative consequences for the patient, the clinician, and health systems.(4)

A number of factors related to the patient-clinician interaction could drive overuse of imaging for low back pain. A review of 17 qualitative studies identified 'perceived pressure from patients' as a key driver of guideline discordant imaging reported by doctors.(5) Indeed, around 50% of patients with low back pain believe imaging is necessary.(6) Also, many clinicians worry about medicolegal liability if they do not provide the test, and feel they lack tools to discuss the need for imaging with their patient.(7)

Tools that promote watchful waiting as an evidence-based alternative to imaging could be effective at reducing overuse. For example, information leaflets to support delayed prescribing, that is, where a GP provides a script but instructs the patient to wait and see if symptoms resolve, can reduce use of antibiotics.(8) One trial in the 1980s found this approach reduced imaging low back pain.(9) There is evidence that written delayed prescribing tools are acceptable to patients considering antibiotics and some screening tests.(10, 11) However, it is unclear how GPs and patients might react to tools for symptomatic conditions where imaging overuse is problematic.

1  
2  
3 In 2019 the Australian Government Department of Health developed a resource pack to  
4 support GPs to reduce unnecessary imaging for musculoskeletal pain, with a key focus on  
5 low back pain. The pack included three newly developed communication tools. One was  
6 developed by the lead author in collaboration with an advertising agency (Overdiagnosis  
7 Leaflet). The remaining two tools (a Dialogue Sheet, and a 'Wait-and-see' Note) were  
8 developed by the Behavioural Economics and Research Team at the Australian Government  
9 Department of Health and with input from researchers and clinicians within the Wiser  
10 Healthcare Research Collaboration. The goal of the tools was to encourage discussions  
11 between patient and clinician about the need for imaging and support a delayed prescribing  
12 approach to reduce unnecessary requests.  
13  
14  
15  
16  
17  
18  
19  
20  
21  
22  
23  
24  
25  
26  
27  
28  
29

30 The aim of this study was to gather GP and patient views on the three newly developed  
31 communication tools to support delayed prescribing of imaging for low back pain.  
32  
33  
34  
35  
36  
37  
38  
39

## 40 Methods

### 41 Study Design and Participants

42 We conducted a qualitative study with 4 focus groups and 8 individual interviews to explore  
43 how GPs and patients understood and responded to the communication tools. We have  
44 prepared this report to adhere to the COREQ checklist (Appendix 1).(12)  
45  
46  
47  
48  
49  
50  
51  
52  
53  
54

55 We used convenience sampling to select participants. We aimed to conduct a minimum of  
56 two focus groups of at least 5 participants for each participant type. We planned additional  
57 "mop-up" individual interviews which took place until saturation was reached. GPs who  
58  
59  
60

1  
2  
3 were practising in Australia were eligible to participate. For the GP participants we recruited  
4  
5 a sample of GPs who were attending a continuing professional development event on 30  
6  
7 July 2019. Of the 23 GPs attending the event who were invited and eligible, 12 agreed to  
8  
9 participate. We recruited an additional 7 GP participants from a separate study. That study's  
10  
11 aim was to explore GP perceptions of audit and feedback letters focused on diagnostic  
12  
13 imaging for musculoskeletal conditions. After the interview about the audit and feedback  
14  
15 letter intervention, GPs were invited to take the three tools away with them to use in their  
16  
17 practice, for a period of 3 weeks. Because they were participating in a separate study, the  
18  
19 four GPs who participated in individual interviews were aware of a broader program of work  
20  
21 to reduce unnecessary care by the Commonwealth Department of Health.  
22  
23  
24  
25  
26  
27  
28  
29

30 For the patient participants we recruited men and women who had sought care for low back  
31  
32 pain between March and June 2019. We identified a consecutive list of adult patients who  
33  
34 presented with 'non-serious' low back pain to the Emergency Department of Liverpool  
35  
36 Hospital, Sydney. Patient participants were approached using text messages from the  
37  
38 hospital clinician and research team. Of the 40 patients who were invited and eligible, 10  
39  
40 agreed to participate in a focus group, and 4 in an individual phone interview.  
41  
42  
43  
44  
45  
46  
47  
48  
49

### 50 **Data Collection**

51  
52 The research team comprised a physiotherapist and research fellow (AT); a PhD student  
53  
54 with background in sociology (SS); two research fellows from the Behavioural Economics  
55  
56 and Research Team, Australian Government (JC, PV); a senior physiotherapist (ET); a  
57  
58 qualitative research assistant (CK); a GP and research fellow (LO); a senior research fellow  
59  
60

1  
2  
3 (DO); and an expert in qualitative research and professor of public health (KM). The focus  
4  
5 groups were facilitated by AT, SS, JC, PV, and CK. The interviews were facilitated by CK, JC  
6  
7 and DO. The focus group facilitators were male (x1) and female (x3). The interviewers (CK,  
8  
9 JC, DO) were female. AT, JC, and CK had experience with qualitative methods including  
10  
11 facilitating focus groups and interviews.  
12  
13  
14  
15  
16  
17

18 Researchers had no professional or ongoing relationship with the participants. Participants  
19  
20 were informed that the researchers were interested in exploring the use of diagnostic  
21  
22 imaging for musculoskeletal pain. The study was introduced to participants as an initiative  
23  
24 to better understand the use of, and communication about, imaging for low back pain. Prior  
25  
26 to beginning the sessions participants completed a written demographic questionnaire so  
27  
28 that we could describe the sample. We asked all participants whether they agreed with the  
29  
30 following statement: *“Everyone who gets low back pain should have an imaging test (x-Ray,*  
31  
32 *CT, MRI).”* Patients were asked an additional question about their history of imaging for low  
33  
34 back pain. GPs were asked additional questions regarding years practicing, their self-  
35  
36 reported imaging rate, and their interest in musculoskeletal conditions.  
37  
38  
39  
40  
41  
42  
43  
44

45 We audio recorded all focus group discussions and interviews. The recordings were  
46  
47 transcribed verbatim. Transcripts were not returned to participants for comment or  
48  
49 correction. Facilitators made field notes throughout the interviews identified salient  
50  
51 themes. After the focus groups, facilitators involved in the sessions (AT, CK, PV, JC, SS, ET)  
52  
53 independently documented their observations and emerging key themes. They then  
54  
55 discussed these initial themes as a team.  
56  
57  
58  
59  
60

### *Focus groups*

Because this project worked to a strict deadline imposed by our Department of Health collaborators, we chose to conduct focus groups primarily to capture the views of several participants in a short time frame.

Each group comprised five to seven people. Sessions had the following format: demographic questionnaire, introduction of study and facilitators, warm-up discussion, presentation of the tools (Powerpoint slides plus paper versions), guided discussion of each tool (Box 1). We held the sessions with GPs at the Institute for Musculoskeletal Health, a clinical research institute at the University of Sydney on 30 July 2019. We held the sessions with patients at a conference facility attached to Liverpool Hospital in Sydney on 23 August 2019. ET attended one of the patient focus groups. The focus group sessions lasted 60 to 90 minutes and had at least two facilitators from the author team.

### *Interviews*

After the focus groups DO and JC conducted additional individual interviews with four GPs and CK conducted additional interviews with four patients. Interviews were conducted over the phone. We used these additional “mop-up” interviews to further explore salient themes that emerged in the focus groups. We stopped recruiting patients for interviews when no new themes emerged (data saturation).(13) Recruitment of GP participants for interviews was limited by resources and not necessarily by data saturation. The interview sessions lasted 20 to 40min. No repeat interviews were carried out.

### *Communication tools and discussion content*

1  
2  
3  
4  
5  
6 Table 1 describes the rationale and content of the three communication tools. We selected  
7  
8 these three tools because they were being used in a broader program of work to reduce  
9  
10 unnecessary diagnostic imaging by the Commonwealth Department of Health. Complete  
11  
12 versions of the tools are included in Appendix 2. The focus groups and interviews followed a  
13  
14 similar discussion format (Box 1). The interview guide was not pilot tested. Each started with  
15  
16 a short warm-up discussion of the role of diagnostic imaging in low back pain. Participants  
17  
18 were then presented with the three tools, in turn, for discussion.  
19  
20  
21  
22  
23  
24  
25  
26  
27

### **Data Analysis**

28  
29  
30 We performed a thematic analysis to identify main themes as well as divergent views.(14).  
31  
32 We based our framework analysis on a phenomenological orientation. That is, we focused  
33  
34 on individual experiences and reactions arising from the data. We started by analysing the  
35  
36 focus groups first. Two authors coded the data from the focus groups (AT, CK) using  
37  
38 Microsoft Word and a third (SS) reviewed the transcripts and coding. The research team  
39  
40 met to discuss themes emerging from the focus groups, and interpretation of the data. Key  
41  
42 themes that the team agreed on were used to develop an initial coding framework for the  
43  
44 data. These discussions of findings from the focus groups also led to refinement of the  
45  
46 discussion guide for the individual interviews. We developed a library of codes in an  
47  
48 iterative process, decided on a coding framework, and applied this framework to the entire  
49  
50 dataset. A refined version of the coding tree is provided in Box 2. We used a 'constant  
51  
52 comparison' approach, which involves continually looking for similarities, differences, and  
53  
54  
55  
56  
57  
58  
59  
60



1  
2  
3 other patterns within and across transcripts.(15) Participants did not provide feedback on  
4  
5 the overall findings.  
6  
7  
8  
9

### 10 **Patient and public involvement**

11  
12 We informally piloted the tools with consumers (n= 4) and clinicians (n=4) to optimise content  
13 prior to enrolling participants. We asked them to provide feedback on the readability,  
14 content, and usefulness of the tools and made minor edits to produce the versions evaluated  
15 in this study.  
16  
17  
18  
19  
20  
21  
22  
23  
24

### 25 **Results**

26  
27 Sixteen GPs and 14 patients participated in the study. Table 2 shows the characteristics of  
28 participants.  
29  
30  
31  
32  
33  
34

35 Twelve GP participants were female and 13 had more than 20 years in practice. None of the  
36 GP participants agreed with the statement: *“Everyone who gets low back pain should have*  
37 *an imaging test (x-Ray, CT, MRI).”* 13 GP participants reported requesting imaging in fewer  
38 than one quarter of their consultations for musculoskeletal imaging, and 8 had an interest in  
39 musculoskeletal conditions  
40  
41  
42  
43  
44  
45  
46  
47  
48  
49

50 Eleven patient participants were born outside of Australia, 12 were between 20 and 60  
51 years of age, and 6 had a university education or higher. All patient participants had had an  
52 imaging test in the past and 11 believed everyone with low back pain should have imaging.  
53  
54  
55  
56  
57  
58  
59  
60

1  
2  
3 Below we summarise the key findings with selected quotes. During the analysis the author  
4 team agreed that the clearest format to present the results was to present views of the two  
5  
6 groups of participants separately. Additional supporting quotes (numbered in text as Q1,  
7  
8 Q2, Q3 and so on) are provided in Appendix 3.  
9  
10  
11  
12  
13  
14

## 15 1. GP views

### 16 **Overall GP reactions**

17  
18  
19  
20 GPs had mixed reactions to the tools (Box 2). Some GPs felt the communication tools could  
21  
22 have a role in helping to manage difficult consultations:  
23  
24

25  
26  
27  
28 “I guess if you had a really stroppy patient you didn’t know and didn’t think you’d get  
29  
30 any follow up with, perhaps there could be a role.” (GP focus group)  
31  
32

33  
34  
35 However, most GPs reacted negatively to the Dialogue Sheet and Wait-and-see Note, and  
36  
37 none of them reported they would use these in practice. They found the concept of written  
38  
39 prompts and co-signing an agreement with their patient, to be an insult to their clinical skill  
40  
41 and autonomy:  
42  
43

44  
45  
46  
47 “No, no, I’d never use [*the dialogue sheet*] in a pink fit.” (GP focus group)  
48  
49  
50

51  
52 GPs felt paper-based tools in general were impractical, easily forgotten, and preferred  
53  
54 verbal reassurance:  
55  
56  
57  
58  
59  
60

1  
2  
3 “Would I use [*the dialogue sheet and note*]? Probably not. I, probably again, I would  
4  
5 document [*instruction to delay*] in the notes. I do document this sort of thing in the  
6  
7 notes” (Female GP, 20+ years of experience)  
8  
9

10  
11  
12  
13 **GP reactions to the Overdiagnosis Leaflet: important content that would be useful in**  
14  
15 **digital format, but may induce patient anxiety**  
16

17  
18  
19  
20 GP participants responded most positively to the design and content of the Overdiagnosis  
21  
22 Leaflet. They valued the condition-specific information such as clinical features for lumbar  
23  
24 imaging and self-management advice (Q1). Some felt the language of the leaflet was too  
25  
26 emphatic and could discourage necessary imaging:  
27  
28

29  
30  
31  
32 “I mean [*the overdiagnosis leaflet*] would scare them off having a scan and maybe it  
33  
34 might scare some of the 1% who do need to have it.” (GP focus group)  
35  
36  
37

38  
39  
40 GP participants expressed a strong preference for easily accessible, web- or electronic  
41  
42 medical record-based fact sheets for use with their patients (Q2).  
43  
44  
45  
46  
47  
48  
49

50 **GP reactions to the Dialogue Sheet: redundant for experienced GPs, would add to time**  
51  
52 **pressure**  
53

54  
55  
56  
57 Most GP participants felt the dialogue sheet would be superfluous, and preferred to  
58  
59 communicate the same messages verbally:  
60

1  
2  
3  
4  
5  
6 “So, as I said, that’s the sort of thing I would be telling the patient as we went, and  
7  
8 maybe summarising at the end, but I would do that in a verbal fashion. I wouldn’t be  
9  
10 filling in a form like this.” (GP focus group)  
11  
12  
13  
14

15 Some were concerned the tools would just add to time pressure within the consultation:  
16  
17

18  
19  
20 “So, if the patient is going to have to sit down and read this, and try to understand it,  
21  
22 and then sign it, it’s just going to lengthen things out. It’s just not going to be  
23  
24 feasible.” (GP focus group)  
25  
26  
27  
28  
29

30 Most GP participants did not want to sign the Dialogue Sheet and felt that patients would  
31  
32 be opposed to signing it as well:  
33  
34  
35  
36

37 “It doesn’t need a contract, we’re not giving morphine out.” (GP focus group)  
38  
39  
40  
41  
42  
43  
44

#### 45 **GP reactions to the Wait-and-see Note: could help validate concerns, but impractical**

46  
47  
48

49 One doctor noted that the language of the Wait-and-see Note could help validate a  
50  
51 patient’s experience:  
52  
53  
54  
55  
56  
57  
58  
59  
60

1  
2  
3 “I guess what the writer was trying to get across was: ‘I acknowledge that you have  
4 real symptoms.’ I think that’s better, the patient wants me to know that they really  
5 have pain.” (GP focus group)  
6  
7  
8  
9

10  
11  
12  
13 A key barrier to use of the note was practicality. Participants felt verbal communication of  
14 similar messages would be more efficient (Q3).  
15  
16  
17

### 18 19 20 **Workforce issues and concerns about patient pushback (all tools):** 21

22  
23  
24  
25 Some GP participants felt the communication tools were more useful for less experienced  
26 doctors or in the community more broadly(Q4):  
27  
28  
29

30  
31  
32 “This [*overdiagnosis leaflet*] is a document that absolutely needs to go [*beyond*]  
33 primary care level, at a community level.” (GP focus group)  
34  
35  
36  
37

38  
39  
40 GPs felt the Dialogue Sheet and Wait-and-see Note would be patronising to patients or  
41 could compromise the clinician-patient relationship:  
42  
43  
44

45  
46  
47 “These pieces of paper are the opposite [*to patient centered care*], these are all  
48 giving me, the doctor, the power. And the patient is the person who’s below me  
49 doing what I have told them.” (GP focus group)  
50  
51  
52  
53

54  
55  
56  
57 “[*If I were to use it with my patients*] They'd probably think I've gone mad.” (Female  
58 GP, 20+ years of experience)  
59  
60

## 1. Patient views

### Overall patient reactions

Patients had generally positive reactions to all three tools (Box 2). In contrast to GP responses, patients valued paper-based, written information and the perceived accountability that a co-signed agreement section on the Dialogue Sheet and Wait-and-see Note would provide:

“I hate it when they don’t keep their word to see you again. So this one, when they sign on it, they have to see you.” (Patient focus group)

For some, the perceived benefit of locating the source of low back pain, and ruling out serious pathology, outweighed any advice to delay an imaging test (Q5). Others regarded the tools with suspicion:

“I’m just now thinking maybe the doctors, the government, whatever, want all the people with the back pain not to do the scans any more, why?” (Patient focus group)

### Patient reactions to the Overdiagnosis Leaflet: informative but alarming, prompts desire to discuss harms of imaging with GP

Most patient participants found the Overdiagnosis Leaflet clear, informative, and credible:

1  
2  
3 “I’m assuming the quote comes from Professor Ian Harris at the bottom of the page.  
4  
5 So yeah I think it’s a fairly accurate statement, easy to understand, good advice. I  
6  
7  
8 guess it’s clarified that he’s an orthopaedic surgeon so that adds some weight to the  
9  
10 comment.” (Male patient, 40-59 years old)  
11  
12  
13  
14

15 Some patients felt the Overdiagnosis Leaflet would encourage them to ask their doctor  
16  
17 questions about their care (Q6). Other patient participants were reluctant to challenge the  
18  
19 perceived authority of their doctor:  
20  
21  
22

23  
24  
25 “I just don’t know if [*my GP*] would be comfortable hearing that from a patient.”  
26  
27  
28 (Male patient, 20-39 years old)  
29  
30  
31

32 There was concern among patient participants that the Overdiagnosis Leaflet would  
33  
34 discourage imaging for those who did need it (Q7). One patient participant reacted  
35  
36 angrily to the concept that some scans might be unnecessary:  
37  
38  
39

40  
41  
42 “Telling me that a scan is not going to find something is a waste of my time. Not a  
43  
44 waste of my time, but I’m angry as soon as I see it. I’m pissed off at that.” (Patient  
45  
46 focus group)  
47  
48  
49  
50  
51  
52  
53

54 **Patient reactions to the Dialogue Sheet: could improve recall of the consultation and**  
55  
56 **provide evidence of GP commitment**  
57  
58  
59  
60

1  
2  
3 In contrast to the Overdiagnosis Leaflet, which provoked some concerns, the Dialogue Sheet  
4 had potential to be reassuring. Patients had mixed reactions to the concept of co-signing an  
5 agreement to not have an imaging test; some felt it would be an odd process (Q8) where  
6 others appreciated the clinician's commitment:  
7  
8  
9

10  
11  
12 "… if he says he reviews us in two weeks, and he's signed it as well, if you come and  
13 he cancels it, it's on him. So it's peace of mind." (Patient focus group participant)  
14  
15  
16

17  
18  
19  
20  
21 **Patient reactions to the Wait-and-see Note: uses dismissive terminology and would be**  
22  
23 **easy to ignore**  
24  
25

26  
27  
28 Some patient participants found the concept of the Wait-and-see Note dismissive. One  
29 patient participant, who was an allied health professional, felt patients might ignore the  
30 note:  
31  
32  
33  
34

35  
36  
37  
38 "I think, personally, people, if they've got the referral there, I think they would just  
39 ignore that [*message to*] wait-and-see." (Female patient, 40-59 years old)  
40  
41  
42  
43  
44

45  
46 **Patient understanding and interpretation of content (all tools): take care with language to**  
47 **describe overdiagnosis and related harms**  
48  
49  
50

51  
52  
53 There was some suspicion among patient participants about the veracity of the data on the  
54 magnitude of overdiagnosis in the Leaflet (Q9). One patient participant understood the link  
55 between overdiagnosis and unnecessary surgery, but felt the odds of this happening were  
56 not concerning:  
57  
58  
59  
60



1  
2  
3  
4  
5  
6           “...so only one will have surgery and they don’t need it. So 1 out 100? [Facilitator:  
7  
8           *Yeah, not that bad do you reckon?]. Well yeah not that bad.”* (Patient focus group)  
9  
10

11  
12  
13       The term “false alarm” was a poorly understood concept. Some patient participants felt the  
14  
15       term indicated that their problem was imaginary (Q10).  
16  
17

18  
19  
20  
21  
22  
23  
24  
25  
26  
27  
28  
29  
30  
31  
32  
33  
34  
35  
36  
37  
38  
39  
40  
41  
42  
43  
44  
45  
46  
47  
48  
49  
50  
51  
52  
53  
54  
55  
56  
57  
58  
59  
60

For peer review only

## Discussion

### Summary

The GPs and patients we interviewed had divergent views on the value of three different communication tools to support delayed prescribing of imaging for low back pain. While almost all GPs rejected a tool with an example dialogue and discussion points, patients desired this process. Some patients appreciated the concept of co-signing an agreement to delay imaging, while others did not. The GPs we interviewed universally rejected this co-signing approach. There was variation in what patients and GPs considered to be a 'harm' from having imaging.

### Strengths and limitations

We conducted this study at a time when advanced imaging rates are increasing.<sup>(4)</sup> Understanding how both GPs and patients might use communication tools will help inform strategies to reduce this problem. We used a combination of focus groups and interviews, and sampled people involved in the decision to have diagnostic imaging in emergency and primary care. This allowed us to capture natural conversations in the groups, and explore emergent themes in depth in the interviews.

We were restricted to recruiting mainly from a GP professional development network, with a small number of additional participants recruited through an additional study. This group may have had more positive views than expected in the wider population of GPs. Though our data suggest they were highly sceptical of the materials and divergent from patients. Similarly, although all of the patients we included had seen a GP for their low back pain, they had also attended the Emergency Department of a public hospital for their low back

1  
2  
3 pain. This diverse group of patients may be different to those who typically attend a GP as  
4  
5 their first or only contact with the health system. The patient participants in this study might  
6  
7 also represent a group who take low back pain very seriously and be more critical of tools to  
8  
9 delay or deter imaging.  
10  
11  
12  
13  
14

### 15 **Comparison with existing literature**

16  
17 Our findings are consistent with research showing that attempts to reduce or delay tests  
18  
19 can arouse suspicion about financial arrangements, government oversight, and motives to  
20  
21 cut costs.(16) This phenomenon also occurs in women considering breast cancer  
22  
23 screening.(17) Our study confirms that mistrust among patients could extend to  
24  
25 communicating about delayed imaging, overdiagnosis, and the option of watchful waiting.  
26  
27  
28  
29  
30  
31

32 We are aware of one other study that evaluated reactions to a communication tool to  
33  
34 support GPs to reduce unnecessary imaging of low back pain. Jenkins et al. examined GP  
35  
36 and consumer reactions to a booklet about lumbar imaging.(18) Similar to our findings,  
37  
38 some GPs preferred digital format whereas consumers appreciated a glossy hard copy to  
39  
40 take home to discuss with their family. Consumers valued detailed, written, individualised  
41  
42 information and reassurance. Our findings suggest that patients may also desire tools that  
43  
44 provide them with a sense that the GP has taken them seriously. The co-signed section in  
45  
46 the Dialogue Sheet and Wait-and-See appeared to achieve this, yet GPs had reservations  
47  
48 about using it.  
49  
50  
51  
52  
53  
54  
55  
56

57 Trials of patient-mediated interventions to reduce imaging rates have had limited success  
58  
59 and suggest challenges to uptake.(19) For example Schectman et al found no effect of  
60

1  
2  
3 patient education tools on imaging rates in their trial including 120 GPs, but only one third  
4  
5 of GPs reported using the tools in the trial.(20) Given the divergent and sometimes strong  
6  
7 views expressed in this study, ongoing evaluation of communication tools to meet the needs  
8  
9 of end-users appears essential.  
10  
11  
12  
13  
14

15 The patients we interviewed reacted with surprise to the nature and magnitude of imaging  
16  
17 overdiagnosis. Many of the patient participants struggled to think of harms of diagnostic  
18  
19 imaging, other than exposure to radiation. This finding supports evidence on patient  
20  
21 perceptions of overused screening tests e.g. the perception that the benefits of early  
22  
23 detection tend to outweigh the harms of unnecessary tests.(21) Our findings on how GPs  
24  
25 describe harms from overdiagnosis suggest that they may also hold this view.  
26  
27  
28  
29  
30  
31

### 32 **Implications for future research and practice**

33  
34 This study provides insights into the complexity of communicating about unnecessary  
35  
36 imaging to patients and GPs. Based on these findings there may be several ways to enhance  
37  
38 acceptability and uptake of delayed prescribing approaches. First, the language relating to  
39  
40 the necessity of diagnostic imaging tests should be cautious rather than emphatic. Patients  
41  
42 may interpret harms differently; tools that describe risk of 'harms' would benefit from also  
43  
44 providing clear examples of overdiagnosis. Second, tools should be in digital format for GPs  
45  
46 but readily printed for patients who prefer paper-based information. Finally, a Dialogue  
47  
48 Sheet with or without a co-sign agreement section requires further testing before  
49  
50 implementing this kind of tool in clinical practice. Together our findings suggest that  
51  
52 information leaflet that explains the problem of overdiagnosis could support a delayed  
53  
54  
55  
56  
57  
58  
59  
60

1  
2  
3 prescribing approach to imaging for low back pain. A Dialogue Sheet and Wait-and-see Note  
4  
5 to help discuss a delayed imaging may be acceptable to patients but not GPs.  
6  
7  
8  
9

### 10 **Author Contributions**

11 *Study concept and design: Traeger, Checketts, Tcharkhedian, O'Connor, Klinner, Sharma*  
12  
13 *Vyas, Albarqouni, McCaffery*

14 *Acquisition of data: Traeger, Checketts, Tcharkhedian, O'Connor, Klinner, Sharma, Vyas*

15  
16 *Analysis, or interpretation of data: Traeger, Checketts, Tcharkhedian, O'Connor, Klinner,*  
17  
18 *Sharma Vyas, Albarqouni, McCaffery*

19  
20 *Drafting of the manuscript: Traeger*

21  
22 *Critical revision of the manuscript for important intellectual content: Traeger, Checketts,*  
23  
24 *Tcharkhedian, O'Connor, Klinner, Sharma Vyas, Albarqouni, McCaffery*

25  
26 *Analysis: Traeger, Checketts, Tcharkhedian, O'Connor, Klinner, Sharma Vyas, Albarqouni,*  
27  
28 *McCaffery*

29  
30 *Obtained funding: McCaffery, Traeger*

31  
32 *Administrative, technical, or material support: none*

33  
34 *Study supervision: Traeger*  
35  
36  
37  
38

39 **Funding:** This research was funded by an NHMRC Program Grant (APP1113532) entitled

40  
41 *Using healthcare wisely: reducing inappropriate use of tests and treatments.*  
42  
43  
44  
45

46 **Role of Funder/Sponsor:** The NHMRC (Program Grant APP1113532) had no role in the  
47  
48 design or conduct of this study.  
49  
50  
51

52 **Data sharing statement:** All data relevant to the study are included in the article or  
53  
54 uploaded as supplementary information.  
55  
56  
57  
58  
59  
60

1  
2  
3 **Ethics:** Study procedures were approved by the University of Sydney HREC (ref: 2019/591),  
4  
5 the Southwest Sydney Local Health District HREC (ref: 2019/ETH00281), and the Bond  
6  
7  
8 University HREC (ref: LA03323).  
9

10  
11  
12  
13 **Conflict of Interest Statement:** None declared.  
14  
15

16  
17  
18 **Acknowledgements:** We thank Prof Chris Maher, Prof Rachele Buchbinder, and Prof Paul  
19  
20 Glasziou for their valuable contributions to developing the tools and Luzian Ong for co-  
21  
22  
23 facilitating a focus group with GPs.  
24  
25  
26  
27  
28  
29  
30  
31  
32  
33  
34  
35  
36  
37  
38  
39  
40  
41  
42  
43  
44  
45  
46  
47  
48  
49  
50  
51  
52  
53  
54  
55  
56  
57  
58  
59  
60

## References

1. Lin I, Wiles L, Waller R, et al. What does best practice care for musculoskeletal pain look like? Eleven consistent recommendations from high-quality clinical practice guidelines: systematic review. *Br J Sports Med.* 2020;54(2):79-86.
2. Downie A, Hancock M, Jenkins H, et al. How common is imaging for low back pain in primary and emergency care? Systematic review and meta-analysis of over 4 million imaging requests across 21 years. *Br J Sports Med.* 2019.
3. Chou R, Qaseem A, Owens DK, Shekelle P. Diagnostic imaging for low back pain: advice for high-value health care from the American College of Physicians. *Ann Intern Med.* 2011;154(3):181-9.
4. Smith-Bindman R, Kwan ML, Marlow EC, et al. Trends in Use of Medical Imaging in US Health Care Systems and in Ontario, Canada, 2000-2016. *JAMA.* 2019;322(9):843-56.
5. Slade SC, Kent P, Patel S, Bucknall T, Buchbinder R. Barriers to Primary Care Clinician Adherence to Clinical Guidelines for the Management of Low Back Pain: A Systematic Review and Metasynthesis of Qualitative Studies. *Clin J Pain.* 2016;32(9):800-16.
6. Jenkins HJ, Hancock MJ, Maher CG, French SD, Magnussen JS. Understanding patient beliefs regarding the use of imaging in the management of low back pain. *Eur J Pain.* 2015.
7. Sears ED, Caverly TJ, Kullgren JT, et al. Clinicians' Perceptions of Barriers to Avoiding Inappropriate Imaging for Low Back Pain-Knowing Is Not Enough. *JAMA Intern Med.* 2016;176(12):1866-8.
8. de Bont EG, Alink M, Falkenberg FC, Dinant GJ, Cals JW. Patient information leaflets to reduce antibiotic use and reconsultation rates in general practice: a systematic review. *BMJ open.* 2015;5(6):e007612.
9. Deyo RA, Diehl AK, Rosenthal M. Reducing roentgenography use. Can patient expectations be altered? *Arch Intern Med.* 1987;147(1):141-5.
10. Bunten A, Hawking M. Patient information can improve appropriate antibiotic prescribing. *Nursing in Practice.* 2015.
11. Jenkins M, Pirotta M, Walker JG, et al. 'Why don't I need a colonoscopy?' A novel approach to communicating risks and benefits of colorectal cancer screening. *Australian journal of general practice.* 2018;47(6):343-9.
12. Tong A, Sainsbury P, Craig J. Consolidated criteria for reporting qualitative research (COREQ): a 32-item checklist for interviews and focus groups. *International journal for quality in health care : journal of the International Society for Quality in Health Care.* 2007;19(6):349-57.

13. Bowen GA. Naturalistic inquiry and the saturation concept: a research note. *Qualitative research*. 2008;8(1):137-52.
14. Clarke V, Braun V, Hayfield N. Thematic analysis. *Qualitative psychology: A practical guide to research methods*. 2015:222-48.
15. Pope C, Ziebland S, Mays N. Qualitative research in health care. Analysing qualitative data. *BMJ*. 2000;320(7227):114-6.
16. Levinson W, Gorawara-Bhat R, Dueck R, et al. Resolving disagreements in the patient-physician relationship: tools for improving communication in managed care. *JAMA*. 1999;282(15):1477-83.
17. Hersch J, Jansen J, Barratt A, et al. Women's views on overdiagnosis in breast cancer screening: a qualitative study. *BMJ*. 2013;346:f158.
18. Jenkins HJ, Moloney NA, French SD, et al. Using behaviour change theory and preliminary testing to develop an implementation intervention to reduce imaging for low back pain. *BMC Health Serv Res*. 2018;18(1):734.
19. French SD, Green S, Buchbinder R, Barnes H. Interventions for improving the appropriate use of imaging in people with musculoskeletal conditions. *Cochrane Database Syst Rev*. 2010;1.
20. Schectman JM, Schroth WS, Verme D, Voss JD. Randomized controlled trial of education and feedback for implementation of guidelines for acute low back pain. *J Gen Intern Med*. 2003;18(10):773-80.
21. Sutkowi-Hemstreet A, Vu M, Harris R, et al. Adult Patients' Perspectives on the Benefits and Harms of Overused Screening Tests: a Qualitative Study. *J Gen Intern Med*. 2015;30(11):1618-26.



**Table 1.** Description and intended use of tools to support delayed prescribing of musculoskeletal imaging

|                                       | <b>Overdiagnosis Leaflet</b>                                                                                                                                                                                                                                                                                                                     | <b>Dialogue Sheet</b>                                                                                                                                                                                                                                                                                                                                                                                       | <b>Wait-and-see Note</b>                                                                                                                                                                                                                                                                                                                    |
|---------------------------------------|--------------------------------------------------------------------------------------------------------------------------------------------------------------------------------------------------------------------------------------------------------------------------------------------------------------------------------------------------|-------------------------------------------------------------------------------------------------------------------------------------------------------------------------------------------------------------------------------------------------------------------------------------------------------------------------------------------------------------------------------------------------------------|---------------------------------------------------------------------------------------------------------------------------------------------------------------------------------------------------------------------------------------------------------------------------------------------------------------------------------------------|
| <b>Why</b><br>Rationale               | Goal:<br>1. promote watchful waiting for people with low back pain<br>2. raise awareness of non-essential or 'low-value' lumbar imaging tests                                                                                                                                                                                                    | Goal:<br>1. promote watchful waiting for people with musculoskeletal pain (including low back pain)<br>2. support doctor-patient communication and joint decision-making<br>3. Provide actions for patients to take to address their pain, as alternatives to imaging.                                                                                                                                      | Goal:<br>1. promote watchful waiting for people with musculoskeletal pain (including low back pain)<br>2. support doctor-patient communication and joint decision-making                                                                                                                                                                    |
| <b>What</b><br>Materials and content  | 6-panel A4 folded leaflet<br><br>Designed by advertising company and researchers<br><br>Key messages<br>- Unnecessary lumbar scans can cause harm<br>- There are alternatives to imaging<br>- Speak to your doctor<br><br>Behavioural prompts<br>- Framing of harms from overdiagnosis<br>- Appeal to authority (quote from orthopaedic surgeon) | 1-page A5 sheet<br><br>Designed by the Commonwealth Department of Health and researchers<br><br>Key messages<br>- In your case I think imaging is unnecessary<br>- I recommend we delay decision to have a scan<br>- There are other actions you can take to address your pain<br><br>Behavioural prompts<br>- Present no imaging as the default<br>- Co-signature (patient and doctor) commitment to delay | 2-sided A6 note<br><br>Designed the Commonwealth Department of Health and researchers<br><br>Key message<br>- The referral is a backup; only to be used under specific circumstances (tailored to the patient)<br><br>Behavioural prompts<br>- Present no imaging as the default<br>- Co-signature (patient and doctor) commitment to delay |
| <b>Tailoring</b><br>to the individual | None                                                                                                                                                                                                                                                                                                                                             | Space to describe symptoms, things to look out for, name and date, customisable reasons to delay, recommended actions to manage pain and assist recovery                                                                                                                                                                                                                                                    | Review date, things to look out for                                                                                                                                                                                                                                                                                                         |

**Box 1: Focus group and interview topic guide***All participants*

- Participants take turns to read the tools and 'think aloud' as they read the content.
- Which elements of the tools did you like? Why?
- Which elements of the tools did you not like? Why?
- Do you have any suggestions for improvement?

*For GP participants*

- Are any of these tools something that you would use? What would improve usability?

*For patient participants*

- Did you gain any new information about imaging from these tools? If your doctor went through these tools with you, how would you feel? What would improve usability?

Table 2. Participant characteristics (n=30)

| Characteristics                                                    | Number of participants |            |
|--------------------------------------------------------------------|------------------------|------------|
|                                                                    | Patients (n=14)        | GPs (n=16) |
| <b>Age</b>                                                         |                        |            |
| 20-39                                                              | 5                      | 2          |
| 40-59                                                              | 7                      | 5          |
| 60-79                                                              | 2                      | 9          |
| <b>Sex</b>                                                         |                        |            |
| Female                                                             | 9                      | 12         |
| Male                                                               | 5                      | 4          |
| <b>Born outside of Australia</b>                                   |                        |            |
| Yes                                                                | 11                     | -          |
| No                                                                 | 3                      | -          |
| <b>University education</b>                                        |                        |            |
| Yes                                                                | 6                      | -          |
| No                                                                 | 8                      | -          |
| <b>Had an imaging test for back pain in the past</b>               | 14                     | -          |
| <b>Believe everyone with low back pain should have a scan</b>      | 11                     | 0          |
| <b>Years practicing as a GP</b>                                    |                        |            |
| 1-9                                                                | -                      | 2          |
| 10-19                                                              | -                      | 1          |
| 20+                                                                | -                      | 13         |
| <b>Self-reported imaging request rate</b>                          |                        |            |
| <10%                                                               | -                      | 6          |
| ~25%                                                               | -                      | 7          |
| ~50%                                                               | -                      | 2          |
| >75%                                                               | -                      | 1          |
| <b>Had an interest in management of musculoskeletal conditions</b> | -                      | 8          |

## Box 2. Summary of GP and patient views on communication tools to support delayed prescribing of imaging for low back pain

### GP views

#### Reaction to Overdiagnosis Leaflet

- *Useful, visually appealing information*
- *May increase anxiety and discourage necessary care*
- *Digitise tools, communicate using other media in waiting room*

#### Reaction to Dialogue Sheet

- *Preference for verbal communication*
- *Could add to time pressure*
- *Reluctance to sign*

#### Reaction to Wait-and-see Note

- *Validating messages*
- *Preference for verbal communication*

#### Workforce issues (all tools)

- *Experienced GPs don't need these tools*

#### Concerns about patient pushback (all tools)

- *Tools could undermine patient-clinician relationship*
- *Patient's (mis)interpretation of 'harms'*

### Patient views

#### Reaction to Overdiagnosis Leaflet

- *Authoritative, informative, reassuring, encourages discussion*
- *Desire for less emphatic language*
- *May increase anxiety, cause anger, and discourage necessary care*

#### Reaction to Dialogue Sheet

- *Appreciated as a take-home tool/memory aid*
- *Co-signed agreement could have mixed response*

#### Reaction to Wait-and-see Note

- *Uses dismissive terminology (e.g. "wait")*
- *Easily ignored*

#### Understanding and interpretation of content (all tools)

- *Understood concept of overdiagnosis but were sceptical of its magnitude*
- *Desire for clear definition of 'harm'*
- *Struggled with terminology for false positives*

## Appendix 1 - COREQ checklist

### The Consolidated Criteria for Reporting Qualitative Studies (COREQ): 32-item checklist

(Table developed from Tong et al., 2007)

| No. Item                                       | Guide questions/description                                                                                                                              | Page Number |
|------------------------------------------------|----------------------------------------------------------------------------------------------------------------------------------------------------------|-------------|
| <b>Domain 1: Research team and reflexivity</b> |                                                                                                                                                          |             |
| <b>The research team</b>                       |                                                                                                                                                          | 6           |
| <b>Personal Characteristics</b>                |                                                                                                                                                          |             |
| 1. Interviewer/facilitator                     | Which author/s conducted the interview or focus group?                                                                                                   | 7           |
| 2. Credentials                                 | What were the researcher's credentials? E.g. PhD, MD                                                                                                     | 1           |
| 3. Occupation                                  | What was their occupation at the time of the study?                                                                                                      | 6           |
| 4. Gender                                      | Was the researcher male or female?                                                                                                                       | 7           |
| 5. Experience and training                     | What experience or training did the researcher(s) have?                                                                                                  | 7           |
| <b>Relationship with participants</b>          |                                                                                                                                                          |             |
| 6. Relationship established                    | Was a relationship established prior to study commencement?                                                                                              | 7           |
| 7. Participant knowledge of the interviewer    | What did the participants know about the researcher? e.g. personal goals, reasons for doing the research                                                 | 7           |
| 8. Interviewer characteristics                 | What characteristics were reported about the interviewer/facilitator? e.g. Bias, assumptions, reasons and interests in the research topic                | 7           |
| <b>Domain 2: Study design</b>                  |                                                                                                                                                          |             |
| <b>Theoretical framework</b>                   |                                                                                                                                                          |             |
| 9. Methodological orientation and Theory       | What methodological orientation was stated to underpin the study? e.g. grounded theory, discourse analysis, ethnography, phenomenology, content analysis | 9           |
| <b>Participant selection</b>                   |                                                                                                                                                          |             |
| 10. Sampling                                   | How were participants selected? e.g. purposive, convenience, consecutive, snowball                                                                       | 5           |
| 11. Method of approach                         | How were participants approached? e.g. face-to-face, telephone, mail, email                                                                              | 6           |
| 12. Sample size                                | How many participants were in the study?                                                                                                                 | 6,10        |
| 13. Non-participation                          | How many people refused to participate or dropped out? Reasons?                                                                                          | 6           |
| <b>Setting</b>                                 |                                                                                                                                                          |             |

|                                        |                                                                                                                                  |       |
|----------------------------------------|----------------------------------------------------------------------------------------------------------------------------------|-------|
| 14. Setting of data collection         | Where was the data collected? e.g. home, clinic, workplace                                                                       | 6     |
| 15. Presence of non-participants       | Was anyone else present besides the participants and researchers?                                                                | 8     |
| 16. Description of sample              | What are the important characteristics of the sample? e.g. demographic data, date                                                | 10    |
| <b>Data collection</b>                 |                                                                                                                                  |       |
| 17. Interview guide                    | Were questions, prompts, guides provided by the authors? Was it pilot tested?                                                    | 9     |
| 18. Repeat interviews                  | Were repeat inter views carried out? If yes, how many?                                                                           | 8     |
| 19. Audio/visual recording             | Did the research use audio or visual recording to collect the data?                                                              | 7     |
| 20. Field notes                        | Were field notes made during and/or after the interview or focus group?                                                          | 7     |
| 21. Duration                           | What was the duration of the interviews or focus group?                                                                          | 8     |
| 22. Data saturation                    | Was data saturation discussed?                                                                                                   | 5,8   |
| 23. Transcripts returned               | Were transcripts returned to participants for comment and/or correction?                                                         | 7     |
| <b>Domain 3: Analysis and findings</b> |                                                                                                                                  |       |
| <b>Data analysis</b>                   |                                                                                                                                  |       |
| 24. Number of data coders              | How many data coders coded the data?                                                                                             | 9     |
| 25. Description of the coding tree     | Did authors provide a description of the coding tree?                                                                            | 9     |
| 26. Derivation of themes               | Were themes identified in advance or derived from the data?                                                                      | 9     |
| 27. Software                           | What software, if applicable, was used to manage the data?                                                                       | 9     |
| 28. Participant checking               | Did participants provide feedback on the findings?                                                                               | 9     |
| <b>Reporting</b>                       |                                                                                                                                  |       |
| 29. Quotations presented               | Were participant quotations presented to illustrate the themes/ findings? Was each quotation identified? E.g. participant number | 10-18 |
| 30. Data and findings consistent       | Was there consistency between the data presented and the findings?                                                               | 10-18 |
| 31. Clarity of major themes            | Were major themes clearly presented in the findings?                                                                             | 10-18 |
| 32. Clarity of minor themes            | Is there a description of diverse cases or discussion of minor themes?                                                           | 10-18 |

Appendix 2 - Tools

Figure S1. Overdiagnosis Leaflet

**“Most people won't benefit from having a scan. It won't find the cause of the pain, and leads to harmful, ineffective treatment”**

---

Professor Ian Harris,  
Orthopaedic Surgeon

**Still unsure?**

When you talk to a doctor, ask:

1. Do I really need a scan?
2. What are the risks?
3. What happens if I don't have a scan?



Institute for Musculoskeletal Health  
School of Public Health, Faculty of Medicine and Health  
The University of Sydney  
Level 10 KGV Building, Missenden Road  
Camperdown NSW 2050  
msk.health@sydney.edu.au  
scanyouroptions.org

**Scan your options**

**— not your back**

**BACK SCANS CAN'T HEAL — THEY CAN HARM**



**What are my options?**

**Not everyone needs a scan**

Back scans include x-rays, CT and MRIs. 99% of people who see a doctor for low back pain do not need a scan. This is important to know, because unnecessary scans cause harm. This leaflet contains information about back scans and other options to help your back pain.

**Unusual back pain**

You may need a scan if you have

- a temperature or fever
- unusual changes going to the toilet
- unusual numbness around your bottom
- cancer
- recent infection or use of injecting drugs
- inability to move legs or feet

**Usual back pain**

The following symptoms do not require a back scan

- spasms
- severe back pain
- difficulty moving

**Why you should scan your options, not your back**

For every 100 people with usual low back pain who get a scan\*

|    |                                    |
|----|------------------------------------|
| 68 | Will get false alarms*             |
| 11 | Will recover more slowly           |
| 1  | Will have surgery they didn't need |
| 0  | Will be better off                 |

\* A false alarm is a test result that seems serious (e.g. 'disc bulge') but is common in healthy people without back pain. Many people get a false alarm on their scan results. This can lead to unnecessary surgery and other treatments that don't help. If you have the usual signs of low back pain, doctors recommend avoiding back scans.

**Get back to better**

**Back pain improves on its own**

You can do things to help your back pain at home—even if your pain is very bad. Expert doctors recommend trying some of the options below to manage your pain in the short term. Doing these things could avoid a long wait at the doctor. If you don't have unusual signs (page 1), you don't have to make a decision about having a back scan right now.

-  Gentle movement
-  Use heat eg. hot water bottle or wheat pack
-  Don't rest for too long
-  Use pharmacy medication (if needed)
-  Give yourself time

Figure S2. Dialogue Sheet

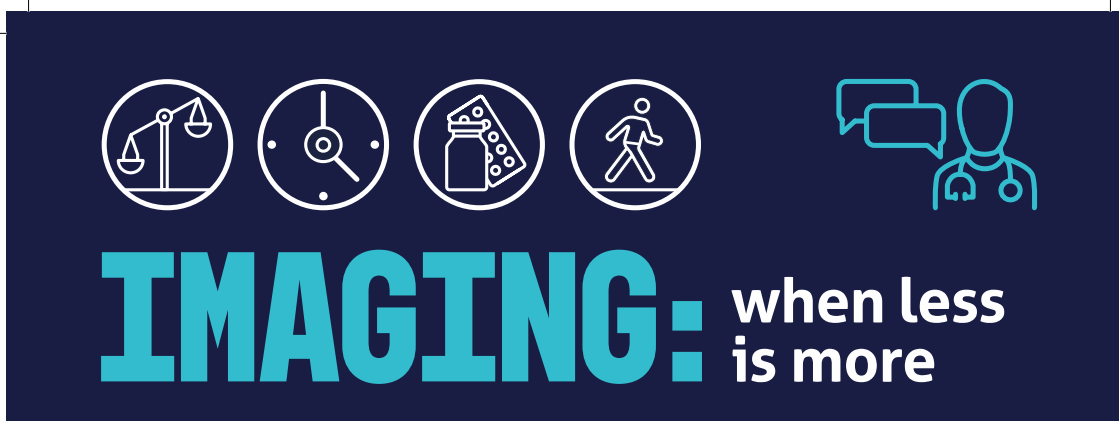

Dear: \_\_\_\_\_

**Based on my review today** \_\_\_\_\_ (date)

I'm not referring you straight for imaging for your

\_\_\_\_\_ pain, because:

- I have checked you and imaging won't change the treatment that you need today
- Your symptoms should improve over the next \_\_\_\_\_ days/weeks
- Findings from imaging can often be unimportant or not significant and cause anxiety and lead to tests that won't help you

**What you can do:**

- Use over the counter medicines for pain relief \_\_\_\_\_ (list medicines)
- Heat/ice for pain relief (circle one)
- Gradually return to your normal activities
- Other \_\_\_\_\_

**If your pain persists I'd like to review you in \_\_\_\_\_ weeks**  
but come back sooner if you are concerned or if the pain changes

I am happy with this plan:  Yes  No (patient to tick)

**Signed:** \_\_\_\_\_ (doctor)

**Signed:** \_\_\_\_\_ (patient)



Figure S3. Wait-and-see Note

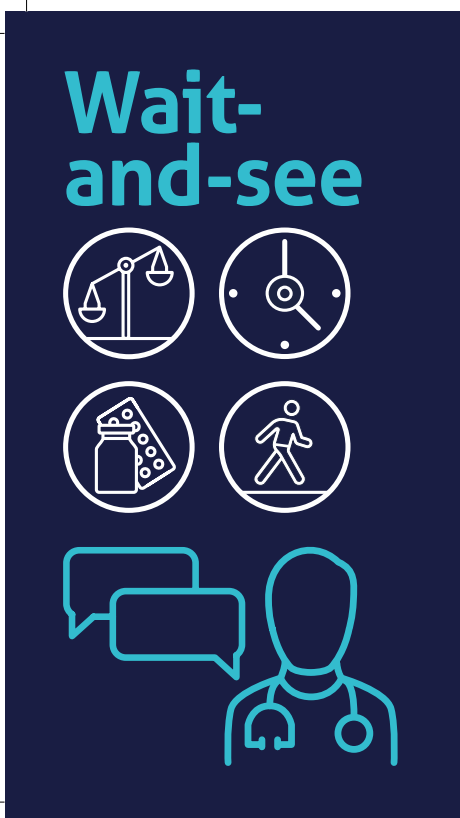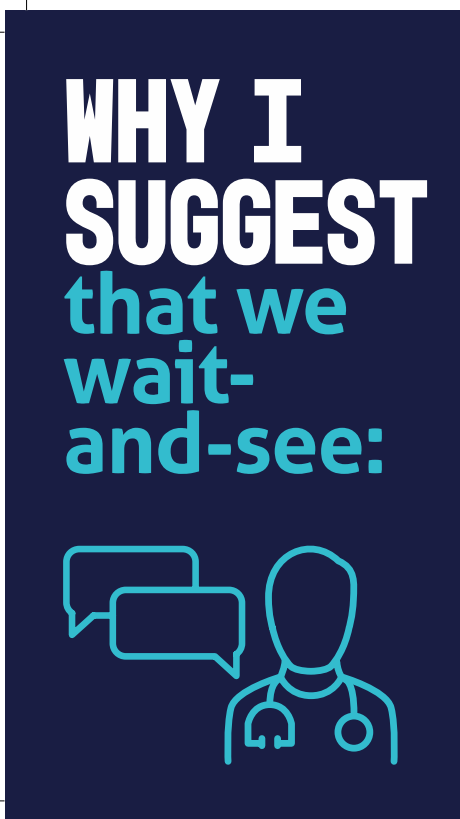

**We have agreed to wait \_\_\_\_\_ weeks before having the test.**

If you have not improved by then, I suggest you have the test and make an appointment with me to discuss the results.

**Signed:** \_\_\_\_\_  
(doctor)

**I am happy with this plan**

Yes  No

**Signed:** \_\_\_\_\_  
(patient)

Why have I asked you to wait? See over for details.

- Musculoskeletal pain can improve rapidly. For example, around 50% of people who experience an episode of back pain recover within 2 weeks.
- There are harms associated with unnecessary imaging.
- I have assessed you and although I don't believe imaging is needed, I can see that you are still concerned.

**Contact me earlier if you experience any of the following:**

\_\_\_\_\_

\_\_\_\_\_

\_\_\_\_\_

### Appendix 3 – Additional supporting quotes

Q1 “It’s got great statements, it’s got statistics, it’s a beautiful document. Not sure about the colours, but the document is great.” (GP focus group)

Q2 “Young people don’t like paper any more. So if you can send it to them so they can have it on their phone [*that would be better than paper*].” (GP focus group)

Q3 “You just tell them verbally most people will get better but, if you’re not, then you can go and have this.” (GP focus group)

Q4 “I think this could be good for a junior doctor, registrar who are not empowered as opposed to more experienced GPs with their loyal patient base.” (GP focus group)

Q5 “I want to know what’s happening inside me and the best way to know is to have an MRI scan. That’s what we’ve been taught for many years that’s what the doctors have said to us. Maybe the new generation can have a different view on it, but from my perspective, I think I would have my ultrasound. I want to know what’s happening inside.” (Male patient, 20-39 years old)

Q6 “I like it. ‘What if I don’t have a scan?’ I find that a really interesting question because yeah, I suppose it just allows more communication by asking that question.... it opens up that communication path again.” (Female patient, 40-59 years old)

Q7 “it potentially causes alarm for people who are going to require a scan.” (Male patient, 40-59 years old)

Q8 “I don’t think signing it really adds any value to it, it just seems a bit strange. It’s like you’re entering into a contract. It just seems a bit unusual to have to sign the document.” (Male patient, 40-59 years old)

1  
2  
3 Q9“Is it real data we’re looking at?” (Patient focus group)  
4  
5

6  
7 Q10“...reading the narrative of that just tells me that perhaps I’m playing it up a bit in my  
8  
9 head.” (Male patient, 40-59 years old)  
10  
11  
12  
13  
14  
15  
16  
17  
18  
19  
20  
21  
22  
23  
24  
25  
26  
27  
28  
29  
30  
31  
32  
33  
34  
35  
36  
37  
38  
39  
40  
41  
42  
43  
44  
45  
46  
47  
48  
49  
50  
51  
52  
53  
54  
55  
56  
57  
58  
59  
60

For peer review only

# BMJ Open

## Patient and general practitioner views of tools to delay diagnostic imaging for low back pain: a qualitative study

|                                 |                                                                                                                                                                                                                                                                                                                                                                                                                                                                                                                                                                                                                                                                                                                                                                                                                                                                                                                                                                                                                                                                     |
|---------------------------------|---------------------------------------------------------------------------------------------------------------------------------------------------------------------------------------------------------------------------------------------------------------------------------------------------------------------------------------------------------------------------------------------------------------------------------------------------------------------------------------------------------------------------------------------------------------------------------------------------------------------------------------------------------------------------------------------------------------------------------------------------------------------------------------------------------------------------------------------------------------------------------------------------------------------------------------------------------------------------------------------------------------------------------------------------------------------|
| Journal:                        | <i>BMJ Open</i>                                                                                                                                                                                                                                                                                                                                                                                                                                                                                                                                                                                                                                                                                                                                                                                                                                                                                                                                                                                                                                                     |
| Manuscript ID                   | bmjopen-2020-039936.R2                                                                                                                                                                                                                                                                                                                                                                                                                                                                                                                                                                                                                                                                                                                                                                                                                                                                                                                                                                                                                                              |
| Article Type:                   | Original research                                                                                                                                                                                                                                                                                                                                                                                                                                                                                                                                                                                                                                                                                                                                                                                                                                                                                                                                                                                                                                                   |
| Date Submitted by the Author:   | 21-Aug-2020                                                                                                                                                                                                                                                                                                                                                                                                                                                                                                                                                                                                                                                                                                                                                                                                                                                                                                                                                                                                                                                         |
| Complete List of Authors:       | <p>Traeger, Adrian; The University of Sydney Faculty of Medicine and Health, Institute for Musculoskeletal Health, Sydney School of Public Health</p> <p>Checketts, Juliet; Australian Commonwealth Department of Health, Behavioural Economics and Research Team</p> <p>Tcharkhedian, Elise; Liverpool Hospital</p> <p>O'Connor, Denise; Monash University, School of Public Health and Preventive Medicine</p> <p>Klinner, Christiane; The University of Sydney Faculty of Medicine and Health, Institute for Musculoskeletal Health, Sydney School of Public Health</p> <p>Sharma, Sweekriti; The University of Sydney Faculty of Medicine and Health, Sydney School of Public Health, Institute for Musculoskeletal Health</p> <p>Vyas, Parima; Australian Commonwealth Department of Health, Behavioural Economics and Research Team</p> <p>Albarqouni, Loai; Bond University Faculty of Health Sciences and Medicine,</p> <p>McCaffery, Kirsten; The University of Sydney, Sydney Health Literacy Lab, School of Public Health; The University of Sydney,</p> |
| <b>Primary Subject Heading</b>: | Qualitative research                                                                                                                                                                                                                                                                                                                                                                                                                                                                                                                                                                                                                                                                                                                                                                                                                                                                                                                                                                                                                                                |
| Secondary Subject Heading:      | Patient-centred medicine, Radiology and imaging, Communication                                                                                                                                                                                                                                                                                                                                                                                                                                                                                                                                                                                                                                                                                                                                                                                                                                                                                                                                                                                                      |
| Keywords:                       | Diagnostic radiology < RADIOLOGY & IMAGING, Quality in health care < HEALTH SERVICES ADMINISTRATION & MANAGEMENT, Rehabilitation medicine < INTERNAL MEDICINE, Back pain < ORTHOPAEDIC & TRAUMA SURGERY, INTERNAL MEDICINE                                                                                                                                                                                                                                                                                                                                                                                                                                                                                                                                                                                                                                                                                                                                                                                                                                          |
|                                 |                                                                                                                                                                                                                                                                                                                                                                                                                                                                                                                                                                                                                                                                                                                                                                                                                                                                                                                                                                                                                                                                     |

SCHOLARONE™  
Manuscripts



I, the Submitting Author has the right to grant and does grant on behalf of all authors of the Work (as defined in the below author licence), an exclusive licence and/or a non-exclusive licence for contributions from authors who are: i) UK Crown employees; ii) where BMJ has agreed a CC-BY licence shall apply, and/or iii) in accordance with the terms applicable for US Federal Government officers or employees acting as part of their official duties; on a worldwide, perpetual, irrevocable, royalty-free basis to BMJ Publishing Group Ltd ("BMJ") its licensees and where the relevant Journal is co-owned by BMJ to the co-owners of the Journal, to publish the Work in this journal and any other BMJ products and to exploit all rights, as set out in our [licence](#).

The Submitting Author accepts and understands that any supply made under these terms is made by BMJ to the Submitting Author unless you are acting as an employee on behalf of your employer or a postgraduate student of an affiliated institution which is paying any applicable article publishing charge ("APC") for Open Access articles. Where the Submitting Author wishes to make the Work available on an Open Access basis (and intends to pay the relevant APC), the terms of reuse of such Open Access shall be governed by a Creative Commons licence – details of these licences and which [Creative Commons](#) licence will apply to this Work are set out in our licence referred to above.

Other than as permitted in any relevant BMJ Author's Self Archiving Policies, I confirm this Work has not been accepted for publication elsewhere, is not being considered for publication elsewhere and does not duplicate material already published. I confirm all authors consent to publication of this Work and authorise the granting of this licence.

# Patient and general practitioner views of tools to delay diagnostic imaging for low back pain: a qualitative study

## Running head: Tools to delay diagnostic imaging

Adrian C Traeger PhD,<sup>1</sup> Juliet Checketts PhD,<sup>2</sup> Elise Tcharkhedian BPhy,<sup>3</sup> Denise A O'Connor PhD,<sup>4,5</sup> Christiane Klinner,<sup>1</sup> Sweekriti Sharma MPH,<sup>1</sup> Parima Vyas,<sup>2</sup> Loai Albarqouni PhD,<sup>6</sup> Kirsten McCaffery PhD<sup>7</sup>

1. The University of Sydney, Faculty of Medicine and Health, Institute for Musculoskeletal Health, Sydney School of Public Health. Level 10 North, King George V Building. Royal Prince Alfred Hospital. Missenden Road, Sydney, NSW, AUS 2050
2. Australian Commonwealth Department of Health, Behavioural Economics and Research Team. Canberra, ACT, AUS 2601
3. Liverpool Hospital, Liverpool, NSW, AUS 1871.
4. Cabrini Institute. Malvern, VIC, AUS 3144
5. Monash University, Department of Epidemiology and Preventive Medicine, School of Public Health and Preventive Medicine. Clayton, VIC, AUS 3144
6. Bond University, Faculty of Health Sciences and Medicine, Gold Coast, QLD, AUS 4229
7. The University of Sydney, Sydney Health Literacy Lab, Faculty of Medicine and Health, School of Public Health, Edward Ford Building (A27). Sydney, NSW, AUS 2006

### Corresponding author:

Dr Adrian Traeger, PhD

adrian.traeger@sydney.edu.au

The University of Sydney

Faculty of Medicine and Health, School of Public Health, Institute for Musculoskeletal Health Level 10N, King George V Building, Royal Prince Alfred Hospital (C39)

PO Box M179, MISSENDEN ROAD NSW 2050

Tel +61 2 8627 6231

**Funding:** *Financial support for this study was provided entirely by a grant from the Australian National Health and Medical Research Council, NHMRC Program Grant (APP1113532) entitled Using healthcare wisely: reducing inappropriate use of tests and treatments. The funding agreement ensured the authors' independence in designing the study, interpreting the data, writing, and publishing the report.*

**Word count:** 4003

**Tables:** 2

**Boxes:** 2

**Figures:** 0

**Appendixes: 3****Abstract**

**OBJECTIVE:** Delayed prescribing is a promising strategy to manage patient requests for unnecessary tests and treatments. The purpose of this study was to explore general practitioner (GP) and patient views of three communication tools (an Overdiagnosis Leaflet, a Dialogue Sheet, and a 'Wait-and-see' Note) to support delayed prescribing of diagnostic imaging.

**DESIGN:** Qualitative study

**SETTING:** Primary and emergency care in Sydney, Australia

**PARTICIPANTS:** 16 GPs and 14 patients with recent episode of low back pain

**OUTCOMES:** Views of tools to delay diagnostic imaging for low back pain. Data were collected using a combination of focus groups and individual interviews.

**ANALYSIS:** Two researchers independently performed a thematic analysis, and the author team reviewed and refined the analysis.

**RESULTS:** GP participants responded positively to an Overdiagnosis Leaflet. The Dialogue Sheet and 'Wait-and-see' Note raised several concerns about patient pushback, adding to time pressure, and being overwhelmed with hard-to-find paper resources. GPs preferred to communicate verbally the reasons to delay an imaging test. For patients, the reactions to the tools were more positive. Patients valued written information and a signed agreement to delay the test. However, patients expressed that a strong desire for diagnostic imaging would be likely override any effect of written advice to delay the test. The term "false alarm" to describe overdiagnosis was poorly understood by patients.

1  
2  
3  
4 **CONCLUSIONS:** GPs and patients agreed that a leaflet about overdiagnosis could support a  
5  
6 delayed prescribing approach to imaging for low back pain. A Dialogue Sheet and 'Wait-and-  
7  
8 see' Note were acceptable to patients but not GPs.  
9  
10

11  
12  
13  
14 **Key words:** diagnostic radiology, quality in healthcare, rehabilitation medicine, back pain,  
15  
16 internal medicine  
17  
18  
19  
20  
21  
22  
23

24 **Strengths and limitations of this study**

- 25  
26 ○ Understanding how both GPs and patients might use communication tools will help  
27  
28 inform strategies to reduce overuse of diagnostic imaging.  
29  
30  
31 ○ Our data collection methods allowed us to capture natural conversations in the focus  
32  
33 groups, and explore emergent themes in depth in the interviews.  
34  
35  
36 ○ GPs included in this study were attending a professional education event and may have  
37  
38 had more positive views of tools to delay imaging than the wider population of GPs.  
39  
40  
41  
42  
43  
44  
45  
46  
47  
48  
49  
50  
51  
52  
53  
54  
55  
56  
57  
58  
59  
60



## Introduction

Guidelines for low back pain recommend that clinicians reserve diagnostic imaging tests for patients who have clinical features of serious pathology.(1) Yet on average general practitioners (GP) refer around one quarter of their patients with low back pain for imaging.(2) In most cases these tests will not bring patients any benefit.(3) Instead, overuse of imaging has negative consequences for the patient, the clinician, and health systems.(4)

A number of factors related to the patient-clinician interaction could drive overuse of imaging for low back pain. A review of 17 qualitative studies identified 'perceived pressure from patients' as a key driver of guideline discordant imaging reported by doctors.(5) Indeed, around 50% of patients with low back pain believe imaging is necessary.(6) Also, many clinicians worry about medicolegal liability if they do not provide the test, and feel they lack tools to discuss the need for imaging with their patient.(7)

Tools that promote watchful waiting as an evidence-based alternative to imaging could be effective at reducing overuse. For example, information leaflets to support delayed prescribing, that is, where a GP provides a script but instructs the patient to wait and see if symptoms resolve, can reduce use of antibiotics.(8) One trial in the 1980s found this approach reduced imaging low back pain.(9) There is evidence that written delayed prescribing tools are acceptable to patients considering antibiotics and some screening tests.(10, 11) However, it is unclear how GPs and patients might react to tools for symptomatic conditions where imaging overuse is problematic.

1  
2  
3 In 2019 the Australian Commonwealth Government Department of Health developed a  
4  
5 resource pack to support GPs as part of a broader program of work to reduce unnecessary  
6  
7 diagnostic imaging for musculoskeletal pain. The pack included three newly developed  
8  
9 communication tools. One was developed by the lead author in collaboration with an  
10  
11 advertising agency (Overdiagnosis Leaflet). The remaining two tools (a Dialogue Sheet, and a  
12  
13 'Wait-and-see' Note) were developed by the Behavioural Economics and Research Team at  
14  
15 the Australian Government Department of Health and with input from researchers and  
16  
17 clinicians within the Wiser Healthcare Research Collaboration. The goal of the tools was to  
18  
19 encourage discussions between patient and clinician about the need for imaging and  
20  
21 support a delayed prescribing approach to reduce unnecessary requests. Before deciding  
22  
23 whether they would distribute the tools to GPs, the Department of Health commissioned a  
24  
25 qualitative evaluation, which we describe here.  
26  
27  
28  
29  
30  
31  
32  
33  
34

35 The aim of this study was to gather GP and patient views on the three newly developed  
36  
37 communication tools to support delayed prescribing of imaging for low back pain.  
38  
39  
40  
41  
42  
43  
44

## 45 Methods

### 46 47 **Study Design and Participants**

48  
49 We conducted a qualitative study with 4 focus groups and 8 individual interviews to explore  
50  
51 how GPs and patients understood and responded to the communication tools. We have  
52  
53 prepared this report to adhere to the COREQ checklist (Appendix 1).(12)  
54  
55  
56  
57  
58  
59  
60

1  
2  
3 We used convenience sampling to select participants. We aimed to conduct a minimum of  
4  
5 two focus groups of at least 5 participants for each participant type. We planned additional  
6  
7 “mop-up” individual interviews which took place until saturation was reached. GPs who  
8  
9 were practising in Australia were eligible to participate. For the GP participants we recruited  
10  
11 a sample of GPs who were attending a continuing professional development event on 30  
12  
13 July 2019. Of the 23 GPs attending the event who were invited and eligible, 12 agreed to  
14  
15 participate in a focus group. We recruited an additional 4 GP participants to participate in  
16  
17 individual interviews, from a separate study. That study’s aim was to explore GP perceptions  
18  
19 of audit and feedback letters focused on diagnostic imaging for musculoskeletal conditions.  
20  
21 After the interview about the audit and feedback letter intervention, GPs were invited to  
22  
23 take the three tools away with them to use in their practice, for a period of 3 weeks (GPs in  
24  
25 the focus groups were not given this opportunity). Because they were participating in a  
26  
27 separate study, the four GPs who participated in individual interviews were aware of a  
28  
29 broader program of work to reduce unnecessary care by the Commonwealth Department of  
30  
31 Health.  
32  
33  
34  
35  
36  
37  
38  
39  
40  
41

42 For the patient participants we recruited men and women who had sought care for low back  
43  
44 pain between March and June 2019. We identified a consecutive list of adult patients who  
45  
46 presented with ‘non-serious’ low back pain to the Emergency Department of Liverpool  
47  
48 Hospital, Sydney. Patient participants were approached using text messages from the  
49  
50 hospital clinician and research team. Of the 40 patients who were invited and eligible, 10  
51  
52 agreed to participate in a focus group, and 4 in an individual phone interview.  
53  
54  
55  
56  
57  
58  
59  
60

## Data Collection

The research team comprised a physiotherapist and research fellow (AT); a PhD student with background in sociology (SS); two research fellows from the Behavioural Economics and Research Team, Australian Government (JC, PV); a senior physiotherapist (ET); a qualitative research assistant (CK); a GP and research fellow (LO); a senior research fellow (DO); and an expert in qualitative research and professor of public health (KM). The focus groups were facilitated by AT, SS, JC, PV, and CK. The interviews were facilitated by CK, JC and DO. The focus group facilitators were male (x1) and female (x3). The interviewers (CK, JC, DO) were female. AT, JC, and CK had experience with qualitative methods including facilitating focus groups and interviews.

Researchers had no professional or ongoing relationship with the participants. Participants were informed that the researchers were interested in exploring the use of diagnostic imaging for musculoskeletal pain. The study was introduced to participants as an initiative to better understand the use of, and communication about, imaging for low back pain. Prior to beginning the sessions participants completed a written demographic questionnaire so that we could describe the sample. We asked all participants whether they agreed with the following statement: *“Everyone who gets low back pain should have an imaging test (x-Ray, CT, MRI).”* Patients were asked an additional question about their history of imaging for low back pain. GPs were asked additional questions regarding years practicing, their self-reported imaging rate, and their interest in musculoskeletal conditions.

We audio recorded all focus group discussions and interviews. The recordings were transcribed verbatim. Transcripts were not returned to participants for comment or

1  
2  
3 correction. Facilitators made field notes throughout the interviews identified salient  
4  
5 themes. After the focus groups, facilitators involved in the sessions (AT, CK, PV, JC, SS, ET)  
6  
7 independently documented their observations and emerging key themes. They then  
8  
9 discussed these initial themes as a team.  
10  
11  
12  
13  
14  
15  
16  
17

### 18 *Focus groups*

19  
20 Each group comprised five to seven people. Sessions had the following format: demographic  
21  
22 questionnaire, introduction of study and facilitators, warm-up discussion, presentation of  
23  
24 the tools (Powerpoint slides plus paper versions), guided discussion of each tool (Box 1). We  
25  
26 held the sessions with GPs at the Institute for Musculoskeletal Health, a clinical research  
27  
28 institute at the University of Sydney on 30 July 2019. We held the sessions with patients at a  
29  
30 conference facility attached to Liverpool Hospital in Sydney on 23 August 2019. ET attended  
31  
32 one of the patient focus groups. The focus group sessions lasted 60 to 90 minutes and had  
33  
34 at least two facilitators from the author team.  
35  
36  
37  
38  
39  
40  
41

### 42 *Interviews*

43  
44 After the focus groups DO and JC conducted additional individual interviews with four GPs  
45  
46 and CK conducted additional interviews with four patients. Interviews were conducted over  
47  
48 the phone. We used these additional “mop-up” interviews to further explore salient themes  
49  
50 that emerged in the focus groups. We stopped recruiting patients for interviews when no  
51  
52 new themes emerged (data saturation).(13) Recruitment of GP participants for interviews  
53  
54 was limited by resources and not necessarily by data saturation. The interview sessions  
55  
56 lasted 20 to 40min. No repeat interviews were carried out.  
57  
58  
59  
60

### *Communication tools and discussion content*

Table 1 describes the rationale and content of the three communication tools. We selected these three tools because they were being used in a broader program of work to reduce unnecessary diagnostic imaging by the Commonwealth Department of Health. Complete versions of the tools are included in Appendix 2. The focus groups and interviews followed a similar discussion format (Box 1). The interview guide was not pilot tested. Each started with a short warm-up discussion of the role of diagnostic imaging in low back pain. Participants were then presented with the three tools, in turn, for discussion.

### **Data Analysis**

Because this project worked to a strict deadline imposed by our Department of Health collaborators, we chose to conduct focus groups primarily to capture the views of several participants in a short time frame.

We performed a thematic analysis to identify main themes as well as divergent views.<sup>(14)</sup> Our thematic approach focused on individual experiences and reactions arising from the data and across case comparisons. We started by analysing the focus groups first. Two authors coded the data from the focus groups (AT, CK) using Microsoft Word and a third (SS) reviewed the transcripts and coding. The research team met to discuss themes emerging from the focus groups, and interpretation of the data. Key themes that the team agreed on were used to develop an initial coding framework for the data. These discussions of findings from the focus groups also led to refinement of the discussion guide for the individual

1  
2  
3 interviews. We developed a library of codes in an iterative process, decided on a coding  
4  
5 framework, and applied this framework to the entire dataset. A refined version of the  
6  
7 coding tree is provided in Box 2. We used a 'constant comparison' approach, which involves  
8  
9 continually looking for similarities, differences, and other patterns within and across  
10  
11 transcripts.(15) Participants did not provide feedback on the overall findings.  
12  
13  
14  
15  
16  
17

### 18 **Patient and public involvement**

19  
20 Patients and the public were not involved in the design or conduct of this study.  
21  
22  
23  
24  
25  
26

### 27 **Results**

28  
29 Sixteen GPs and 14 patients participated in the study. Table 2 shows the characteristics of  
30  
31 participants.  
32  
33  
34  
35  
36

37 Twelve GP participants were female and 13 had more than 20 years in practice. None of the  
38  
39 GP participants agreed with the statement: *"Everyone who gets low back pain should have*  
40  
41 *an imaging test (x-Ray, CT, MRI)."* 13 GP participants reported requesting imaging in fewer  
42  
43 than one quarter of their consultations for musculoskeletal imaging, and 8 had an interest in  
44  
45 musculoskeletal conditions  
46  
47  
48  
49  
50

51 Eleven patient participants were born outside of Australia, 12 were between 20 and 60  
52  
53 years of age, and 6 had a university education or higher. All patient participants had had an  
54  
55 imaging test in the past and 11 believed everyone with low back pain should have imaging.  
56  
57  
58  
59  
60

1  
2  
3 Below we summarise the key findings with selected quotes. During the analysis the author  
4 team agreed that the clearest format to present the results was to present views of the two  
5  
6 groups of participants separately. Additional supporting quotes (numbered in text as Q1,  
7  
8 Q2, Q3 and so on) are provided in Appendix 3.  
9  
10  
11  
12  
13  
14

## 15 1. GP views

### 16 **Overall GP reactions**

17  
18  
19  
20 GPs had mixed reactions to the tools (Box 2). Some GPs felt the communication tools could  
21  
22 have a role in helping to manage difficult consultations:  
23  
24

25  
26  
27  
28 “I guess if you had a really stroppy patient you didn’t know and didn’t think you’d get  
29  
30 any follow up with, perhaps there could be a role.” (GP focus group)  
31  
32

33  
34  
35 However, most GPs reacted negatively to the Dialogue Sheet and Wait-and-see Note, and  
36  
37 none of them reported they would use these in practice. They found the concept of written  
38  
39 prompts and co-signing an agreement with their patient, to be an insult to their clinical skill  
40  
41 and autonomy:  
42  
43

44  
45  
46  
47 “No, no, I’d never use [*the dialogue sheet*] in a pink fit.” (GP focus group)  
48  
49  
50

51  
52 GPs felt paper-based tools in general were impractical, easily forgotten, and preferred  
53  
54 verbal reassurance:  
55  
56  
57  
58  
59  
60



1  
2  
3 “Would I use [*the dialogue sheet and note*]? Probably not. I, probably again, I would  
4  
5 document [*instruction to delay*] in the notes. I do document this sort of thing in the  
6  
7 notes” (Female GP, 20+ years of experience)  
8  
9

10  
11  
12  
13 **GP reactions to the Overdiagnosis Leaflet: important content that would be useful in**  
14  
15 **digital format, but may induce patient anxiety**  
16

17  
18  
19  
20 GP participants responded most positively to the design and content of the Overdiagnosis  
21  
22 Leaflet. They valued the condition-specific information such as clinical features for lumbar  
23  
24 imaging and self-management advice (Q1). Some felt the language of the leaflet was too  
25  
26 emphatic and could discourage necessary imaging:  
27  
28

29  
30  
31  
32 “I mean [*the overdiagnosis leaflet*] would scare them off having a scan and maybe it  
33  
34 might scare some of the 1% who do need to have it.” (GP focus group)  
35  
36  
37

38  
39  
40 GP participants expressed a strong preference for easily accessible, web- or electronic  
41  
42 medical record-based fact sheets for use with their patients (Q2).  
43  
44  
45  
46  
47  
48  
49

50 **GP reactions to the Dialogue Sheet: redundant for experienced GPs, would add to time**  
51  
52 **pressure**  
53

54  
55  
56  
57 Most GP participants felt the dialogue sheet would be superfluous, and preferred to  
58  
59 communicate the same messages verbally:  
60

1  
2  
3  
4  
5  
6 “So, as I said, that’s the sort of thing I would be telling the patient as we went, and  
7  
8 maybe summarising at the end, but I would do that in a verbal fashion. I wouldn’t be  
9  
10 filling in a form like this.” (GP focus group)  
11  
12  
13  
14

15 Some were concerned the tools would just add to time pressure within the consultation:  
16  
17

18  
19  
20 “So, if the patient is going to have to sit down and read this, and try to understand it,  
21  
22 and then sign it, it’s just going to lengthen things out. It’s just not going to be  
23  
24 feasible.” (GP focus group)  
25  
26  
27  
28  
29

30 Most GP participants did not want to sign the Dialogue Sheet and felt that patients would  
31  
32 be opposed to signing it as well:  
33  
34  
35  
36

37 “It doesn’t need a contract, we’re not giving morphine out.” (GP focus group)  
38  
39  
40  
41  
42  
43  
44

#### 45 **GP reactions to the Wait-and-see Note: could help validate concerns, but impractical**

46  
47  
48

49 One doctor noted that the language of the Wait-and-see Note could help validate a  
50  
51 patient’s experience:  
52  
53  
54  
55  
56  
57  
58  
59  
60

1  
2  
3 “I guess what the writer was trying to get across was: ‘I acknowledge that you have  
4 real symptoms.’ I think that’s better, the patient wants me to know that they really  
5 have pain.” (GP focus group)  
6  
7  
8  
9

10  
11  
12  
13 A key barrier to use of the note was practicality. Participants felt verbal communication of  
14 similar messages would be more efficient (Q3).  
15  
16  
17

### 18 19 20 **Workforce issues and concerns about patient pushback (all tools):** 21

22  
23  
24  
25 Some GP participants felt the communication tools were more useful for less experienced  
26 doctors or in the community more broadly(Q4):  
27  
28  
29

30  
31  
32 “This [*overdiagnosis leaflet*] is a document that absolutely needs to go [*beyond*]  
33 primary care level, at a community level.” (GP focus group)  
34  
35  
36  
37

38  
39  
40 GPs felt the Dialogue Sheet and Wait-and-see Note would be patronising to patients or  
41 could compromise the clinician-patient relationship:  
42  
43  
44

45  
46  
47 “These pieces of paper are the opposite [*to patient centered care*], these are all  
48 giving me, the doctor, the power. And the patient is the person who’s below me  
49 doing what I have told them.” (GP focus group)  
50  
51  
52  
53

54  
55  
56  
57 “[*If I were to use it with my patients*] They'd probably think I've gone mad.” (Female  
58 GP, 20+ years of experience)  
59  
60

## 1. Patient views

### Overall patient reactions

Patients had generally positive reactions to all three tools (Box 2). In contrast to GP responses, patients valued paper-based, written information and the perceived accountability that a co-signed agreement section on the Dialogue Sheet and Wait-and-see Note would provide:

“I hate it when they don’t keep their word to see you again. So this one, when they sign on it, they have to see you.” (Patient focus group)

For some, the perceived benefit of locating the source of low back pain, and ruling out serious pathology, outweighed any advice to delay an imaging test (Q5). Others regarded the tools with suspicion:

“I’m just now thinking maybe the doctors, the government, whatever, want all the people with the back pain not to do the scans any more, why?” (Patient focus group)

### Patient reactions to the Overdiagnosis Leaflet: informative but alarming, prompts desire to discuss harms of imaging with GP

Most patient participants found the Overdiagnosis Leaflet clear, informative, and credible:

1  
2  
3 “I’m assuming the quote comes from Professor Ian Harris at the bottom of the page.  
4  
5 So yeah I think it’s a fairly accurate statement, easy to understand, good advice. I  
6  
7  
8 guess it’s clarified that he’s an orthopaedic surgeon so that adds some weight to the  
9  
10 comment.” (Male patient, 40-59 years old)  
11  
12  
13  
14

15 Some patients felt the Overdiagnosis Leaflet would encourage them to ask their doctor  
16  
17 questions about their care (Q6). Other patient participants were reluctant to challenge the  
18  
19 perceived authority of their doctor:  
20  
21  
22

23  
24  
25 “I just don’t know if [*my GP*] would be comfortable hearing that from a patient.”  
26  
27  
28 (Male patient, 20-39 years old)  
29  
30  
31

32 There was concern among patient participants that the Overdiagnosis Leaflet would  
33  
34 discourage imaging for those who did need it (Q7). One patient participant reacted  
35  
36 angrily to the concept that some scans might be unnecessary:  
37  
38  
39

40  
41  
42 “Telling me that a scan is not going to find something is a waste of my time. Not a  
43  
44 waste of my time, but I’m angry as soon as I see it. I’m pissed off at that.” (Patient  
45  
46 focus group)  
47  
48  
49  
50  
51  
52  
53

54 **Patient reactions to the Dialogue Sheet: could improve recall of the consultation and**  
55  
56 **provide evidence of GP commitment**  
57  
58  
59  
60

1  
2  
3 In contrast to the Overdiagnosis Leaflet, which provoked some concerns, the Dialogue Sheet  
4 had potential to be reassuring. Patients had mixed reactions to the concept of co-signing an  
5 agreement to not have an imaging test; some felt it would be an odd process (Q8) where  
6 others appreciated the clinician's commitment:  
7  
8  
9

10  
11  
12 "… if he says he reviews us in two weeks, and he's signed it as well, if you come and  
13 he cancels it, it's on him. So it's peace of mind." (Patient focus group participant)  
14  
15  
16

17  
18  
19  
20  
21 **Patient reactions to the Wait-and-see Note: uses dismissive terminology and would be**  
22  
23 **easy to ignore**  
24  
25

26  
27  
28 Some patient participants found the concept of the Wait-and-see Note dismissive. One  
29 patient participant, who was an allied health professional, felt patients might ignore the  
30 note:  
31  
32  
33

34  
35  
36  
37  
38 "I think, personally, people, if they've got the referral there, I think they would just  
39 ignore that [*message to*] wait-and-see." (Female patient, 40-59 years old)  
40  
41  
42

43  
44  
45 **Patient understanding and interpretation of content (all tools): take care with language to**  
46  
47 **describe overdiagnosis and related harms**  
48  
49

50  
51  
52 There was some suspicion among patient participants about the veracity of the data on the  
53 magnitude of overdiagnosis in the Leaflet (Q9). One patient participant understood the link  
54 between overdiagnosis and unnecessary surgery, but felt the odds of this happening were  
55 not concerning:  
56  
57  
58  
59  
60

1  
2  
3  
4  
5  
6           “...so only one will have surgery and they don’t need it. So 1 out 100? [*Facilitator:*  
7  
8           *Yeah, not that bad do you reckon?*]. Well yeah not that bad.” (Patient focus group)  
9  
10

11  
12  
13       The term “false alarm” was a poorly understood concept. Some patient participants felt the  
14  
15       term indicated that their problem was imaginary (Q10).  
16  
17

18  
19  
20  
21  
22  
23  
24  
25  
26  
27  
28  
29  
30  
31  
32  
33  
34  
35  
36  
37  
38  
39  
40  
41  
42  
43  
44  
45  
46  
47  
48  
49  
50  
51  
52  
53  
54  
55  
56  
57  
58  
59  
60

For peer review only

## Discussion

### Summary

The GPs and patients we interviewed had divergent views on the value of three different communication tools to support delayed prescribing of imaging for low back pain. While almost all GPs rejected a tool with an example dialogue and discussion points, patients desired this process. Some patients appreciated the concept of co-signing an agreement to delay imaging, while others did not. The GPs we interviewed universally rejected this co-signing approach. There was variation in what patients and GPs considered to be a 'harm' from having imaging.

### Strengths and limitations

We conducted this study at a time when advanced imaging rates are increasing.<sup>(4)</sup> Understanding how both GPs and patients might use communication tools will help inform strategies to reduce this problem. We used a combination of focus groups and interviews, and sampled people involved in the decision to have diagnostic imaging in emergency and primary care. This allowed us to capture natural conversations in the groups, and explore emergent themes in depth in the interviews.

We were restricted to recruiting mainly from a GP professional development network, with a small number of additional participants recruited through an additional study. This group may have had more positive views than expected in the wider population of GPs. Though our data suggest they were highly sceptical of the materials and divergent from patients.

Unfortunately, none of the 4 GPs who offered to take the tools away could reflect on use of the tools in practice, either because they did not see an appropriate patient in the 3-week



1  
2  
3 period, or because they forgot. This means that the views expressed here are restricted to  
4  
5 hypothetical, rather than experiential, use of these tools. Although all of the patients we  
6  
7 included had seen a GP for their low back pain, they had also attended the Emergency  
8  
9 Department of a public hospital for their low back pain. This diverse group of patients may  
10  
11 be different to those who typically attend a GP as their first or only contact with the health  
12  
13 system. The patient participants in this study might also represent a group who take low  
14  
15 back pain very seriously and be more critical of tools to delay or deter imaging.  
16  
17  
18  
19  
20  
21  
22

### 23 **Comparison with existing literature**

24  
25 Our findings are consistent with research showing that attempts to reduce or delay tests  
26  
27 can arouse suspicion about financial arrangements, government oversight, and motives to  
28  
29 cut costs.(16) This phenomenon also occurs in women considering breast cancer  
30  
31 screening.(17) Our study confirms that mistrust among patients could extend to  
32  
33 communicating about delayed imaging, overdiagnosis, and the option of watchful waiting.  
34  
35  
36  
37  
38  
39

40 We are aware of one other study that evaluated reactions to a communication tool to  
41  
42 support GPs to reduce unnecessary imaging of low back pain. Jenkins et al. examined GP  
43  
44 and health consumer (community members with a history of low back pain) reactions to a  
45  
46 booklet about lumbar imaging.(18) Similar to our findings, some GPs preferred digital  
47  
48 format whereas health consumers appreciated a glossy hard copy to take home to discuss  
49  
50 with their family. Health consumers valued detailed, written, individualised information and  
51  
52 reassurance. Our findings suggest that patients may also desire tools that provide them with  
53  
54 a sense that the GP has taken them seriously. The co-signed section in the Dialogue Sheet  
55  
56 and Wait-and-See appeared to achieve this, yet GPs had reservations about using it.  
57  
58  
59  
60

1  
2  
3  
4  
5  
6 Trials of patient-mediated interventions to reduce imaging rates have had limited success  
7  
8 and suggest challenges to uptake.(19) For example Schectman et al found no effect of  
9  
10 patient education tools on imaging rates in their trial including 120 GPs, but only one third  
11  
12 of GPs reported using the tools in the trial.(20) Given the divergent and sometimes strong  
13  
14 views expressed in this study, ongoing evaluation of communication tools to meet the needs  
15  
16 of end-users appears essential.  
17  
18  
19  
20  
21  
22

23 The patients we interviewed reacted with surprise to the nature and magnitude of imaging  
24  
25 overdiagnosis. Many of the patient participants struggled to think of harms of diagnostic  
26  
27 imaging, other than exposure to radiation. This finding supports evidence on patient  
28  
29 perceptions of overused screening tests e.g. the perception that the benefits of early  
30  
31 detection tend to outweigh the harms of unnecessary tests.(21) Our findings on how GPs  
32  
33 describe harms from overdiagnosis suggest that they may also hold this view.  
34  
35  
36  
37  
38  
39

#### 40 **Implications for future research and practice**

41  
42 This study provides insights into the complexity of communicating about unnecessary  
43  
44 imaging to patients and GPs. Based on these findings there may be several ways to enhance  
45  
46 acceptability and uptake of delayed prescribing approaches. First, the language relating to  
47  
48 the necessity of diagnostic imaging tests should be cautious rather than emphatic. Patients  
49  
50 may interpret harms differently; tools that describe risk of 'harms' would benefit from also  
51  
52 providing clear examples of overdiagnosis. Second, tools should be in digital format for GPs  
53  
54 but readily printed for patients who prefer paper-based information. We may not have  
55  
56 reached saturation on the key ways a GP might integrate communication tools into their  
57  
58  
59  
60

1  
2  
3 workflow. Future research on how best to integrate delayed prescribing tools into workflow  
4  
5 (e.g. via access to leaflets, printed tear-off sheets, web- or app-based tool, electronic  
6  
7  
8 medical record-based tools) would be informative for initiatives to reduce overuse. Finally, a  
9  
10 Dialogue Sheet with or without a co-sign agreement section requires further testing before  
11  
12 implementing this kind of tool in clinical practice. Together our findings suggest that  
13  
14 information leaflet that explains the problem of overdiagnosis could support a delayed  
15  
16 prescribing approach to imaging for low back pain. A Dialogue Sheet and Wait-and-see Note  
17  
18 to help discuss a delayed imaging may be acceptable to patients but not GPs.  
19  
20  
21  
22  
23  
24

### 25 **Author Contributions**

26 *Study concept and design: Traeger, Checketts, Tcharkhedian, O'Connor, Klinner, Sharma*  
27  
28 *Vyas, Albarqouni, McCaffery*

29 *Acquisition of data: Traeger, Checketts, Tcharkhedian, O'Connor, Klinner, Sharma, Vyas*

30  
31 *Analysis, or interpretation of data: Traeger, Checketts, Tcharkhedian, O'Connor, Klinner,*  
32  
33 *Sharma Vyas, Albarqouni, McCaffery*

34  
35 *Drafting of the manuscript: Traeger*

36  
37 *Critical revision of the manuscript for important intellectual content: Traeger, Checketts,*  
38  
39 *Tcharkhedian, O'Connor, Klinner, Sharma Vyas, Albarqouni, McCaffery*

40  
41 *Analysis: Traeger, Checketts, Tcharkhedian, O'Connor, Klinner, Sharma Vyas, Albarqouni,*  
42  
43 *McCaffery*

44  
45 *Obtained funding: McCaffery, Traeger*

46  
47 *Administrative, technical, or material support: none*

48  
49 *Study supervision: Traeger*  
50  
51  
52

53 **Funding:** This research was funded by an NHMRC Program Grant (APP1113532) entitled

54  
55 *Using healthcare wisely: reducing inappropriate use of tests and treatments.*  
56  
57  
58  
59  
60

1  
2  
3 **Role of Funder/Sponsor:** The NHMRC (Program Grant APP1113532) had no role in the  
4 design or conduct of this study.  
5  
6  
7

8  
9 **Data sharing statement:** All data relevant to the study are included in the article or  
10 uploaded as supplementary information.  
11  
12  
13

14  
15  
16  
17 **Ethics:** Study procedures were approved by the University of Sydney HREC (ref: 2019/591),  
18 the Southwest Sydney Local Health District HREC (ref: 2019/ETH00281), and the Bond  
19 University HREC (ref: LA03323).  
20  
21  
22  
23

24  
25  
26  
27 **Conflict of Interest Statement:** None declared.  
28  
29  
30

31  
32 **Acknowledgements:** We thank Prof Chris Maher, Prof Rachele Buchbinder, and Prof Paul  
33 Glasziou for their valuable contributions to developing the tools and Luzian Ong for co-  
34 facilitating a focus group with GPs.  
35  
36  
37  
38  
39  
40  
41  
42  
43  
44  
45  
46  
47  
48  
49  
50  
51  
52  
53  
54  
55  
56  
57  
58  
59  
60

## References

1. Lin I, Wiles L, Waller R, et al. What does best practice care for musculoskeletal pain look like? Eleven consistent recommendations from high-quality clinical practice guidelines: systematic review. *Br J Sports Med.* 2020;54(2):79-86.
2. Downie A, Hancock M, Jenkins H, et al. How common is imaging for low back pain in primary and emergency care? Systematic review and meta-analysis of over 4 million imaging requests across 21 years. *Br J Sports Med.* 2019.
3. Chou R, Qaseem A, Owens DK, Shekelle P. Diagnostic imaging for low back pain: advice for high-value health care from the American College of Physicians. *Ann Intern Med.* 2011;154(3):181-9.
4. Smith-Bindman R, Kwan ML, Marlow EC, et al. Trends in Use of Medical Imaging in US Health Care Systems and in Ontario, Canada, 2000-2016. *JAMA.* 2019;322(9):843-56.
5. Slade SC, Kent P, Patel S, Bucknall T, Buchbinder R. Barriers to Primary Care Clinician Adherence to Clinical Guidelines for the Management of Low Back Pain: A Systematic Review and Metasynthesis of Qualitative Studies. *Clin J Pain.* 2016;32(9):800-16.
6. Jenkins HJ, Hancock MJ, Maher CG, French SD, Magnussen JS. Understanding patient beliefs regarding the use of imaging in the management of low back pain. *Eur J Pain.* 2015.
7. Sears ED, Caverly TJ, Kullgren JT, et al. Clinicians' Perceptions of Barriers to Avoiding Inappropriate Imaging for Low Back Pain-Knowing Is Not Enough. *JAMA Intern Med.* 2016;176(12):1866-8.
8. de Bont EG, Alink M, Falkenberg FC, Dinant GJ, Cals JW. Patient information leaflets to reduce antibiotic use and reconsultation rates in general practice: a systematic review. *BMJ open.* 2015;5(6):e007612.
9. Deyo RA, Diehl AK, Rosenthal M. Reducing roentgenography use. Can patient expectations be altered? *Arch Intern Med.* 1987;147(1):141-5.
10. Bunten A, Hawking M. Patient information can improve appropriate antibiotic prescribing. *Nursing in Practice.* 2015.
11. Jenkins M, Pirotta M, Walker JG, et al. 'Why don't I need a colonoscopy?' A novel approach to communicating risks and benefits of colorectal cancer screening. *Australian journal of general practice.* 2018;47(6):343-9.
12. Tong A, Sainsbury P, Craig J. Consolidated criteria for reporting qualitative research (COREQ): a 32-item checklist for interviews and focus groups. *International journal for quality in health care : journal of the International Society for Quality in Health Care.* 2007;19(6):349-57.
13. Bowen GA. Naturalistic inquiry and the saturation concept: a research note. *Qualitative research.* 2008;8(1):137-52.
14. Clarke V, Braun V, Hayfield N. Thematic analysis. *Qualitative psychology: A practical guide to research methods.* 2015:222-48.
15. Pope C, Ziebland S, Mays N. Qualitative research in health care. Analysing qualitative data. *BMJ.* 2000;320(7227):114-6.
16. Levinson W, Gorawara-Bhat R, Dueck R, et al. Resolving disagreements in the patient-physician relationship: tools for improving communication in managed care. *JAMA.* 1999;282(15):1477-83.

17. Hersch J, Jansen J, Barratt A, et al. Women's views on overdiagnosis in breast cancer screening: a qualitative study. *BMJ*. 2013;346:f158.
18. Jenkins HJ, Moloney NA, French SD, et al. Using behaviour change theory and preliminary testing to develop an implementation intervention to reduce imaging for low back pain. *BMC Health Serv Res*. 2018;18(1):734.
19. French SD, Green S, Buchbinder R, Barnes H. Interventions for improving the appropriate use of imaging in people with musculoskeletal conditions. *Cochrane Database Syst Rev*. 2010;1.
20. Schectman JM, Schroth WS, Verme D, Voss JD. Randomized controlled trial of education and feedback for implementation of guidelines for acute low back pain. *J Gen Intern Med*. 2003;18(10):773-80.
21. Sutkowi-Hemstreet A, Vu M, Harris R, et al. Adult Patients' Perspectives on the Benefits and Harms of Overused Screening Tests: a Qualitative Study. *J Gen Intern Med*. 2015;30(11):1618-26.

**Table 1.** Description and intended use of tools to support delayed prescribing of musculoskeletal imaging

|                                       | <b>Overdiagnosis Leaflet</b>                                                                                                                                                                                                                                                                                                                     | <b>Dialogue Sheet</b>                                                                                                                                                                                                                                                                                                                                                                                       | <b>Wait-and-see Note</b>                                                                                                                                                                                                                                                                                                                    |
|---------------------------------------|--------------------------------------------------------------------------------------------------------------------------------------------------------------------------------------------------------------------------------------------------------------------------------------------------------------------------------------------------|-------------------------------------------------------------------------------------------------------------------------------------------------------------------------------------------------------------------------------------------------------------------------------------------------------------------------------------------------------------------------------------------------------------|---------------------------------------------------------------------------------------------------------------------------------------------------------------------------------------------------------------------------------------------------------------------------------------------------------------------------------------------|
| <b>Why</b><br>Rationale               | Goal:<br>1. promote watchful waiting for people with low back pain<br>2. raise awareness of non-essential or 'low-value' lumbar imaging tests                                                                                                                                                                                                    | Goal:<br>1. promote watchful waiting for people with musculoskeletal pain (including low back pain)<br>2. support doctor-patient communication and joint decision-making<br>3. Provide actions for patients to take to address their pain, as alternatives to imaging.                                                                                                                                      | Goal:<br>1. promote watchful waiting for people with musculoskeletal pain (including low back pain)<br>2. support doctor-patient communication and joint decision-making                                                                                                                                                                    |
| <b>What</b><br>Materials and content  | 6-panel A4 folded leaflet<br><br>Designed by advertising company and researchers<br><br>Key messages<br>- Unnecessary lumbar scans can cause harm<br>- There are alternatives to imaging<br>- Speak to your doctor<br><br>Behavioural prompts<br>- Framing of harms from overdiagnosis<br>- Appeal to authority (quote from orthopaedic surgeon) | 1-page A5 sheet<br><br>Designed by the Commonwealth Department of Health and researchers<br><br>Key messages<br>- In your case I think imaging is unnecessary<br>- I recommend we delay decision to have a scan<br>- There are other actions you can take to address your pain<br><br>Behavioural prompts<br>- Present no imaging as the default<br>- Co-signature (patient and doctor) commitment to delay | 2-sided A6 note<br><br>Designed the Commonwealth Department of Health and researchers<br><br>Key message<br>- The referral is a backup; only to be used under specific circumstances (tailored to the patient)<br><br>Behavioural prompts<br>- Present no imaging as the default<br>- Co-signature (patient and doctor) commitment to delay |
| <b>Tailoring</b><br>to the individual | None                                                                                                                                                                                                                                                                                                                                             | Space to describe symptoms, things to look out for, name and date, customisable reasons to delay, recommended actions to manage pain and assist recovery                                                                                                                                                                                                                                                    | Review date, things to look out for                                                                                                                                                                                                                                                                                                         |

**Box 1: Focus group and interview topic guide***All participants*

- Participants take turns to read the tools and 'think aloud' as they read the content.
- Which elements of the tools did you like? Why?
- Which elements of the tools did you not like? Why?
- Do you have any suggestions for improvement?

*For GP participants*

- Are any of these tools something that you would use? What would improve usability?

*For patient participants*

- Did you gain any new information about imaging from these tools? If your doctor went through these tools with you, how would you feel? What would improve usability?



**Table 2. Participant characteristics (n=30)**

| Characteristics                                                    | Number of participants |            |
|--------------------------------------------------------------------|------------------------|------------|
|                                                                    | Patients (n=14)        | GPs (n=16) |
| <b>Age</b>                                                         |                        |            |
| 20-39                                                              | 5                      | 2          |
| 40-59                                                              | 7                      | 5          |
| 60-79                                                              | 2                      | 9          |
| <b>Sex</b>                                                         |                        |            |
| Female                                                             | 9                      | 12         |
| Male                                                               | 5                      | 4          |
| <b>Born outside of Australia</b>                                   |                        |            |
| Yes                                                                | 11                     | -          |
| No                                                                 | 3                      | -          |
| <b>University education</b>                                        |                        |            |
| Yes                                                                | 6                      | -          |
| No                                                                 | 8                      | -          |
| <b>Had an imaging test for back pain in the past</b>               | 14                     | -          |
| <b>Believe everyone with low back pain should have a scan</b>      | 11                     | 0          |
| <b>Years practicing as a GP</b>                                    |                        |            |
| 1-9                                                                | -                      | 2          |
| 10-19                                                              | -                      | 1          |
| 20+                                                                | -                      | 13         |
| <b>Self-reported imaging request rate</b>                          |                        |            |
| <10%                                                               | -                      | 6          |
| ~25%                                                               | -                      | 7          |
| ~50%                                                               | -                      | 2          |
| >75%                                                               | -                      | 1          |
| <b>Had an interest in management of musculoskeletal conditions</b> | -                      | 8          |

## Box 2. Summary of GP and patient views on communication tools to support delayed prescribing of imaging for low back pain

### GP views

#### Reaction to Overdiagnosis Leaflet

- *Useful, visually appealing information*
- *May increase anxiety and discourage necessary care*
- *Digitise tools, communicate using other media in waiting room*

#### Reaction to Dialogue Sheet

- *Preference for verbal communication*
- *Could add to time pressure*
- *Reluctance to sign*

#### Reaction to Wait-and-see Note

- *Validating messages*
- *Preference for verbal communication*

#### Workforce issues (all tools)

- *Experienced GPs don't need these tools*

#### Concerns about patient pushback (all tools)

- *Tools could undermine patient-clinician relationship*
- *Patient's (mis)interpretation of 'harms'*

### Patient views

#### Reaction to Overdiagnosis Leaflet

- *Authoritative, informative, reassuring, encourages discussion*
- *Desire for less emphatic language*
- *May increase anxiety, cause anger, and discourage necessary care*

#### Reaction to Dialogue Sheet

- *Appreciated as a take-home tool/memory aid*
- *Co-signed agreement could have mixed response*

#### Reaction to Wait-and-see Note

- *Uses dismissive terminology (e.g. "wait")*
- *Easily ignored*

#### Understanding and interpretation of content (all tools)

- *Understood concept of overdiagnosis but were sceptical of its magnitude*
- *Desire for clear definition of 'harm'*
- *Struggled with terminology for false positives*

## Appendix 1 - COREQ checklist

### The Consolidated Criteria for Reporting Qualitative Studies (COREQ): 32-item checklist

(Table developed from Tong et al., 2007)

| No. Item                                       | Guide questions/description                                                                                                                              | Page Number |
|------------------------------------------------|----------------------------------------------------------------------------------------------------------------------------------------------------------|-------------|
| <b>Domain 1: Research team and reflexivity</b> |                                                                                                                                                          |             |
| <b>The research team</b>                       |                                                                                                                                                          | 6           |
| <b>Personal Characteristics</b>                |                                                                                                                                                          |             |
| 1. Interviewer/facilitator                     | Which author/s conducted the interview or focus group?                                                                                                   | 7           |
| 2. Credentials                                 | What were the researcher's credentials? E.g. PhD, MD                                                                                                     | 1           |
| 3. Occupation                                  | What was their occupation at the time of the study?                                                                                                      | 6           |
| 4. Gender                                      | Was the researcher male or female?                                                                                                                       | 7           |
| 5. Experience and training                     | What experience or training did the researcher(s) have?                                                                                                  | 7           |
| <b>Relationship with participants</b>          |                                                                                                                                                          |             |
| 6. Relationship established                    | Was a relationship established prior to study commencement?                                                                                              | 7           |
| 7. Participant knowledge of the interviewer    | What did the participants know about the researcher? e.g. personal goals, reasons for doing the research                                                 | 7           |
| 8. Interviewer characteristics                 | What characteristics were reported about the interviewer/facilitator? e.g. Bias, assumptions, reasons and interests in the research topic                | 7           |
| <b>Domain 2: Study design</b>                  |                                                                                                                                                          |             |
| <b>Theoretical framework</b>                   |                                                                                                                                                          |             |
| 9. Methodological orientation and Theory       | What methodological orientation was stated to underpin the study? e.g. grounded theory, discourse analysis, ethnography, phenomenology, content analysis | 9           |
| <b>Participant selection</b>                   |                                                                                                                                                          |             |
| 10. Sampling                                   | How were participants selected? e.g. purposive, convenience, consecutive, snowball                                                                       | 5           |
| 11. Method of approach                         | How were participants approached? e.g. face-to-face, telephone, mail, email                                                                              | 6           |
| 12. Sample size                                | How many participants were in the study?                                                                                                                 | 6,10        |
| 13. Non-participation                          | How many people refused to participate or dropped out? Reasons?                                                                                          | 6           |
| <b>Setting</b>                                 |                                                                                                                                                          |             |

|                                        |                                                                                                                                  |       |
|----------------------------------------|----------------------------------------------------------------------------------------------------------------------------------|-------|
| 14. Setting of data collection         | Where was the data collected? e.g. home, clinic, workplace                                                                       | 6     |
| 15. Presence of non-participants       | Was anyone else present besides the participants and researchers?                                                                | 8     |
| 16. Description of sample              | What are the important characteristics of the sample? e.g. demographic data, date                                                | 10    |
| <b>Data collection</b>                 |                                                                                                                                  |       |
| 17. Interview guide                    | Were questions, prompts, guides provided by the authors? Was it pilot tested?                                                    | 9     |
| 18. Repeat interviews                  | Were repeat inter views carried out? If yes, how many?                                                                           | 8     |
| 19. Audio/visual recording             | Did the research use audio or visual recording to collect the data?                                                              | 7     |
| 20. Field notes                        | Were field notes made during and/or after the interview or focus group?                                                          | 7     |
| 21. Duration                           | What was the duration of the interviews or focus group?                                                                          | 8     |
| 22. Data saturation                    | Was data saturation discussed?                                                                                                   | 5,8   |
| 23. Transcripts returned               | Were transcripts returned to participants for comment and/or correction?                                                         | 7     |
| <b>Domain 3: Analysis and findings</b> |                                                                                                                                  |       |
| <b>Data analysis</b>                   |                                                                                                                                  |       |
| 24. Number of data coders              | How many data coders coded the data?                                                                                             | 9     |
| 25. Description of the coding tree     | Did authors provide a description of the coding tree?                                                                            | 9     |
| 26. Derivation of themes               | Were themes identified in advance or derived from the data?                                                                      | 9     |
| 27. Software                           | What software, if applicable, was used to manage the data?                                                                       | 9     |
| 28. Participant checking               | Did participants provide feedback on the findings?                                                                               | 9     |
| <b>Reporting</b>                       |                                                                                                                                  |       |
| 29. Quotations presented               | Were participant quotations presented to illustrate the themes/ findings? Was each quotation identified? E.g. participant number | 10-18 |
| 30. Data and findings consistent       | Was there consistency between the data presented and the findings?                                                               | 10-18 |
| 31. Clarity of major themes            | Were major themes clearly presented in the findings?                                                                             | 10-18 |
| 32. Clarity of minor themes            | Is there a description of diverse cases or discussion of minor themes?                                                           | 10-18 |

## Appendix 2 - Tools

### Figure S1. Overdiagnosis Leaflet

**“Most people won't benefit from having a scan. It won't find the cause of the pain, and leads to harmful, ineffective treatment”**

Professor Ian Harris,  
Orthopaedic Surgeon

**Still unsure?**

When you talk to a doctor, ask:

1. Do I really need a scan?
2. What are the risks?
3. What happens if I don't have a scan?

 THE UNIVERSITY OF SYDNEY

Institute for Musculoskeletal Health  
School of Public Health, Faculty of Medicine and Health  
The University of Sydney  
Level 10 KGV Building, Missenden Road  
Camperdown NSW 2050  
msk.health@sydney.edu.au  
scanyouroptions.org

**Scan your options**

**— not your back**

**BACK SCANS CAN'T HEAL  
— THEY CAN HARM**

**What are my options?**

**Not everyone needs a scan**

Back scans include x-rays, CT and MRIs. 99% of people who see a doctor for low back pain do not need a scan. This is important to know, because unnecessary scans cause harm. This leaflet contains information about back scans and other options to help your back pain.

**Unusual back pain**

You may need a scan if you have

- a temperature or fever
- unusual changes going to the toilet
- unusual numbness around your bottom
- cancer
- recent infection or use of injecting drugs
- inability to move legs or feet

**Usual back pain**

The following symptoms do not require a back scan

- spasms
- severe back pain
- difficulty moving

**Why you should scan your options, not your back**

For every 100 people with **usual** low back pain who get a scan\*

|    |                                    |
|----|------------------------------------|
| 68 | Will get false alarms*             |
| 11 | Will recover more slowly           |
| 1  | Will have surgery they didn't need |
| 0  | Will be better off                 |

\* A false alarm is a test result that seems serious (e.g. 'disc bulge') but is common in healthy people without back pain. Many people get a false alarm on their scan results. This can lead to unnecessary surgery and other treatments that don't help. If you have the usual signs of low back pain, doctors recommend avoiding back scans.

**Get back to better**

**Back pain improves on its own**

You can do things to help your back pain at home—even if your pain is very bad. Expert doctors recommend trying some of the options below to manage your pain in the short term. Doing these things could avoid a long wait at the doctor. If you don't have unusual signs (page 1), you don't have to make a decision about having a back scan right now.

-  Gentle movement
-  Use heat eg. hot water bottle or wheat pack
-  Don't rest for too long
-  Use pharmacy medication (if needed)
-  Give yourself time

Figure S2. Dialogue Sheet

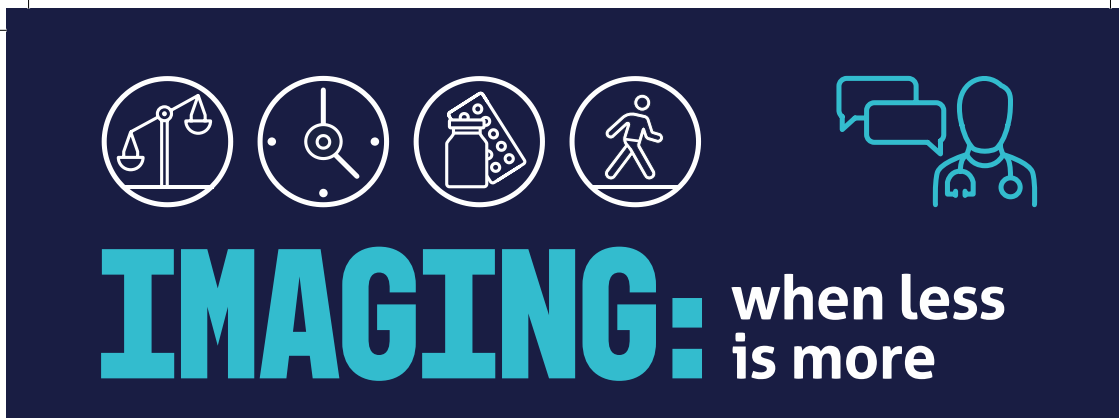

Dear: \_\_\_\_\_

**Based on my review today** \_\_\_\_\_ (date)

I'm not referring you straight for imaging for your

\_\_\_\_\_ pain, because:

- I have checked you and imaging won't change the treatment that you need today
- Your symptoms should improve over the next \_\_\_\_\_ days/weeks
- Findings from imaging can often be unimportant or not significant and cause anxiety and lead to tests that won't help you

**What you can do:**

- Use over the counter medicines for pain relief \_\_\_\_\_ (list medicines)
- Heat/ice for pain relief (circle one)
- Gradually return to your normal activities
- Other \_\_\_\_\_

**If your pain persists I'd like to review you in \_\_\_\_\_ weeks**  
but come back sooner if you are concerned or if the pain changes

I am happy with this plan:  Yes  No (patient to tick)

**Signed:** \_\_\_\_\_ (doctor)

**Signed:** \_\_\_\_\_ (patient)

Figure S3. Wait-and-see Note

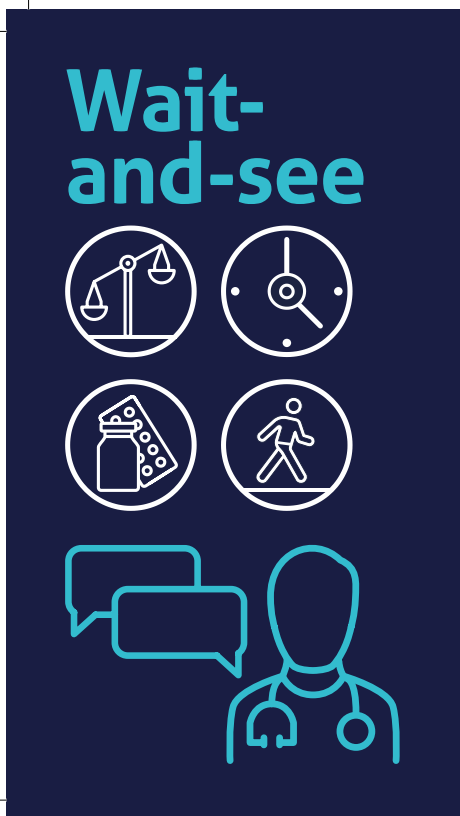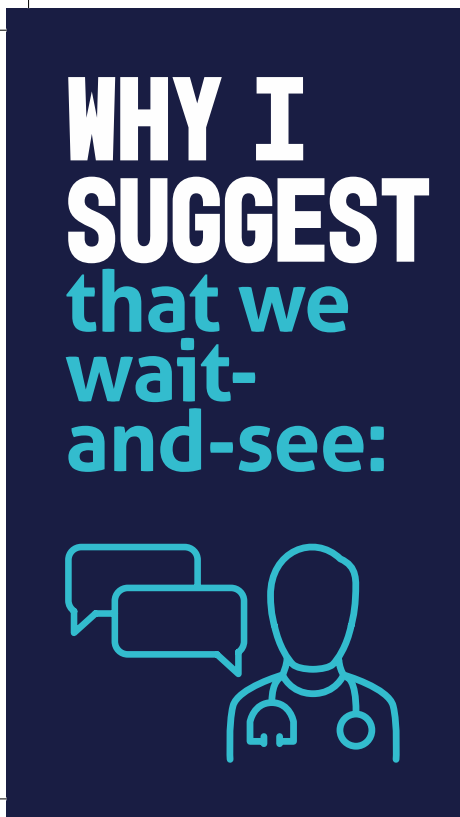

**We have agreed to wait \_\_\_\_\_ weeks before having the test.**

If you have not improved by then, I suggest you have the test and make an appointment with me to discuss the results.

**Signed:** \_\_\_\_\_  
(doctor)

**I am happy with this plan**

Yes  No

**Signed:** \_\_\_\_\_  
(patient)

Why have I asked you to wait? See over for details.

- Musculoskeletal pain can improve rapidly. For example, around 50% of people who experience an episode of back pain recover within 2 weeks.
- There are harms associated with unnecessary imaging.
- I have assessed you and although I don't believe imaging is needed, I can see that you are still concerned.

**Contact me earlier if you experience any of the following:**

\_\_\_\_\_

\_\_\_\_\_

\_\_\_\_\_

### Appendix 3 – Additional supporting quotes

Q1 “It’s got great statements, it’s got statistics, it’s a beautiful document. Not sure about the colours, but the document is great.” (GP focus group)

Q2 “Young people don’t like paper any more. So if you can send it to them so they can have it on their phone [*that would be better than paper*].” (GP focus group)

Q3 “You just tell them verbally most people will get better but, if you’re not, then you can go and have this.” (GP focus group)

Q4 “I think this could be good for a junior doctor, registrar who are not empowered as opposed to more experienced GPs with their loyal patient base.” (GP focus group)

Q5 “I want to know what’s happening inside me and the best way to know is to have an MRI scan. That’s what we’ve been taught for many years that’s what the doctors have said to us. Maybe the new generation can have a different view on it, but from my perspective, I think I would have my ultrasound. I want to know what’s happening inside.” (Male patient, 20-39 years old)

Q6 “I like it. ‘What if I don’t have a scan?’ I find that a really interesting question because yeah, I suppose it just allows more communication by asking that question.... it opens up that communication path again.” (Female patient, 40-59 years old)

Q7 “it potentially causes alarm for people who are going to require a scan.” (Male patient, 40-59 years old)

Q8 “I don’t think signing it really adds any value to it, it just seems a bit strange. It’s like you’re entering into a contract. It just seems a bit unusual to have to sign the document.” (Male patient, 40-59 years old)



1  
2  
3 Q9“Is it real data we’re looking at?” (Patient focus group)  
4  
5

6  
7 Q10“...reading the narrative of that just tells me that perhaps I’m playing it up a bit in my  
8  
9 head.” (Male patient, 40-59 years old)  
10  
11  
12  
13  
14  
15  
16  
17  
18  
19  
20  
21  
22  
23  
24  
25  
26  
27  
28  
29  
30  
31  
32  
33  
34  
35  
36  
37  
38  
39  
40  
41  
42  
43  
44  
45  
46  
47  
48  
49  
50  
51  
52  
53  
54  
55  
56  
57  
58  
59  
60

For peer review only
