# Supplementary material for: Patient and general practitioner views of tools to delay diagnostic imaging for low back pain: a qualitative study
Source: PubMed Central journal article supplement — BMJ Open. 2020 Nov 8;10(11):e039936. doi: 10.1136/bmjopen-2020-039936 (PMC7651716; doi:10.1136/bmjopen-2020-039936), 2020-11-08
Supplement: bmjopen-2020-039936supp001.pdf [file bmjopen-2020-039936supp001.pdf]

**Appendix 1 - COREQ checklist****The Consolidated Criteria for Reporting Qualitative Studies (COREQ): 32-item checklist**

(Table developed from Tong et al., 2007)

| No. Item                                       | Guide questions/description                                                                                                                              | Page Number |
|------------------------------------------------|----------------------------------------------------------------------------------------------------------------------------------------------------------|-------------|
| <b>Domain 1: Research team and reflexivity</b> |                                                                                                                                                          |             |
| <b>The research team</b>                       |                                                                                                                                                          | 6           |
| <b>Personal Characteristics</b>                |                                                                                                                                                          |             |
| 1. Inter viewer/facilitator                    | Which author/s conducted the interview or focus group?                                                                                                   | 7           |
| 2. Credentials                                 | What were the researcher's credentials? E.g. PhD, MD                                                                                                     | 1           |
| 3. Occupation                                  | What was their occupation at the time of the study?                                                                                                      | 6           |
| 4. Gender                                      | Was the researcher male or female?                                                                                                                       | 7           |
| 5. Experience and training                     | What experience or training did the researcher(s) have?                                                                                                  | 7           |
| <b>Relationship with participants</b>          |                                                                                                                                                          |             |
| 6. Relationship established                    | Was a relationship established prior to study commencement?                                                                                              | 7           |
| 7. Participant knowledge of the interviewer    | What did the participants know about the researcher? e.g. personal goals, reasons for doing the research                                                 | 7           |
| 8. Interviewer characteristics                 | What characteristics were reported about the inter viewer/facilitator? e.g. Bias, assumptions, reasons and interests in the research topic               | 7           |
| <b>Domain 2: Study design</b>                  |                                                                                                                                                          |             |
| <b>Theoretical framework</b>                   |                                                                                                                                                          |             |
| 9. Methodological orientation and Theory       | What methodological orientation was stated to underpin the study? e.g. grounded theory, discourse analysis, ethnography, phenomenology, content analysis | 9           |
| <b>Participant selection</b>                   |                                                                                                                                                          |             |
| 10. Sampling                                   | How were participants selected? e.g. purposive, convenience, consecutive, snowball                                                                       | 5           |
| 11. Method of approach                         | How were participants approached? e.g. face-to-face, telephone, mail, email                                                                              | 6           |
| 12. Sample size                                | How many participants were in the study?                                                                                                                 | 6,10        |
| 13. Non-participation                          | How many people refused to participate or dropped out? Reasons?                                                                                          | 6           |
| <b>Setting</b>                                 |                                                                                                                                                          |             |

|                                        |                                                                                                                                  |       |
|----------------------------------------|----------------------------------------------------------------------------------------------------------------------------------|-------|
| 14. Setting of data collection         | Where was the data collected? e.g. home, clinic, workplace                                                                       | 6     |
| 15. Presence of non-participants       | Was anyone else present besides the participants and researchers?                                                                | 8     |
| 16. Description of sample              | What are the important characteristics of the sample? e.g. demographic data, date                                                | 10    |
| <b>Data collection</b>                 |                                                                                                                                  |       |
| 17. Interview guide                    | Were questions, prompts, guides provided by the authors? Was it pilot tested?                                                    | 9     |
| 18. Repeat interviews                  | Were repeat inter views carried out? If yes, how many?                                                                           | 8     |
| 19. Audio/visual recording             | Did the research use audio or visual recording to collect the data?                                                              | 7     |
| 20. Field notes                        | Were field notes made during and/or after the interview or focus group?                                                          | 7     |
| 21. Duration                           | What was the duration of the interviews or focus group?                                                                          | 8     |
| 22. Data saturation                    | Was data saturation discussed?                                                                                                   | 5,8   |
| 23. Transcripts returned               | Were transcripts returned to participants for comment and/or correction?                                                         | 7     |
| <b>Domain 3: Analysis and findings</b> |                                                                                                                                  |       |
| <b>Data analysis</b>                   |                                                                                                                                  |       |
| 24. Number of data coders              | How many data coders coded the data?                                                                                             | 9     |
| 25. Description of the coding tree     | Did authors provide a description of the coding tree?                                                                            | 9     |
| 26. Derivation of themes               | Were themes identified in advance or derived from the data?                                                                      | 9     |
| 27. Software                           | What software, if applicable, was used to manage the data?                                                                       | 9     |
| 28. Participant checking               | Did participants provide feedback on the findings?                                                                               | 9     |
| <b>Reporting</b>                       |                                                                                                                                  |       |
| 29. Quotations presented               | Were participant quotations presented to illustrate the themes/ findings? Was each quotation identified? E.g. participant number | 10-18 |
| 30. Data and findings consistent       | Was there consistency between the data presented and the findings?                                                               | 10-18 |
| 31. Clarity of major themes            | Were major themes clearly presented in the findings?                                                                             | 10-18 |
| 32. Clarity of minor themes            | Is there a description of diverse cases or discussion of minor themes?                                                           | 10-18 |
