# Supplementary material for: Patient and general practitioner views of tools to delay diagnostic imaging for low back pain: a qualitative study
Source: PubMed Central journal article supplement — BMJ Open. 2020 Nov 8;10(11):e039936. doi: 10.1136/bmjopen-2020-039936 (PMC7651716; doi:10.1136/bmjopen-2020-039936), 2020-11-08
Supplement: bmjopen-2020-039936supp003.pdf [file bmjopen-2020-039936supp003.pdf]

### Appendix 3 – Additional supporting quotes

Q1 “It’s got great statements, it’s got statistics, it’s a beautiful document. Not sure about the colours, but the document is great.” (GP focus group)

Q2 “Young people don’t like paper any more. So if you can send it to them so they can have it on their phone [*that would be better than paper*].” (GP focus group)

Q3 “You just tell them verbally most people will get better but, if you’re not, then you can go and have this.” (GP focus group)

Q4 “I think this could be good for a junior doctor, registrar who are not empowered as opposed to more experienced GPs with their loyal patient base.” (GP focus group)

Q5 “I want to know what’s happening inside me and the best way to know is to have an MRI scan. That’s what we’ve been taught for many years that’s what the doctors have said to us. Maybe the new generation can have a different view on it, but from my perspective, I think I would have my ultrasound. I want to know what’s happening inside.” (Male patient, 20-39 years old)

Q6 “I like it. ‘What if I don’t have a scan?’ I find that a really interesting question because yeah, I suppose it just allows more communication by asking that question.... it opens up that communication path again.” (Female patient, 40-59 years old)

Q7 “it potentially causes alarm for people who are going to require a scan.” (Male patient, 40-59 years old)

Q8 “I don’t think signing it really adds any value to it, it just seems a bit strange. It’s like you’re entering into a contract. It just seems a bit unusual to have to sign the document.” (Male patient, 40-59 years old)

Q9“Is it real data we’re looking at?” (Patient focus group)

Q10“...reading the narrative of that just tells me that perhaps I’m playing it up a bit in my head.” (Male patient, 40-59 years old)
